# Supplementary material for: Alternative Sigma Factor Over-Expression Enables Heterologous Expression of a Type II Polyketide Biosynthetic Pathway in Escherichia coli
Source: PubMed Central journal article supplement (PMC3665592; doi:10.1371/journal.pone.0064858), 2013-05-28
Supplement: pone.0064858.s006.pdf [file pone.0064858.s006.pdf]

**Strain and Std Curve****Gene****Ct (dRn)****BAP1+DCS11**Y = -3.245\*LOG(X) + 18.68; Eff.= 103.6%; R<sup>2</sup>=0.991

|             |       |
|-------------|-------|
| <i>rpoN</i> | 24.19 |
|             | 20.95 |
|             | 18.24 |
| <i>oxyB</i> | 38.87 |
|             | 38.66 |
|             | 39.66 |
| <i>oxyF</i> | 31.65 |
|             | 31.7  |
|             | 31.94 |
| <i>oxyK</i> | 32.18 |
|             | 29.07 |
|             | 31.04 |
| <i>oxyP</i> | 33.97 |
|             | 35.06 |
|             | 34.33 |
| <i>oxyT</i> | 33.95 |
|             | 34.39 |
|             | 37    |

**BAP1+MRH08**Y = -3.321\*LOG(X) + 14.72; Eff.= 100.0%; R<sup>2</sup>=0.992

|             |       |
|-------------|-------|
| <i>rpoN</i> | 19.79 |
|             | 23.11 |
|             | 21.11 |
| <i>oxyB</i> | No Ct |
|             | 35.13 |
|             | 31.25 |
| <i>oxyF</i> | 20.17 |
|             | 23.97 |
|             | 22.63 |
| <i>oxyK</i> | 18.02 |
|             | 22.79 |
|             | 17.12 |
| <i>oxyP</i> | 19    |
|             | 24.6  |
|             | 20.2  |
| <i>oxyT</i> | 23    |
|             | No Ct |
|             | 25.25 |

**BAP1+MRH08+DCS11**Y = -3.245\*LOG(X) + 18.68; Eff.= 103.6%; R<sup>2</sup>=0.991

|             |       |
|-------------|-------|
| <i>rpoN</i> | 15.9  |
|             | 15.86 |
|             | 15.15 |
| <i>oxyB</i> | 26.19 |

|             |       |
|-------------|-------|
|             | 23.92 |
| <i>oxyF</i> | 24.41 |
|             | 25.79 |
| <i>oxyK</i> | 21.2  |
|             | 22.06 |
| <i>oxyP</i> | 22.43 |
|             | 23.77 |
| <i>oxyT</i> | 29.07 |
|             | 27.99 |

**BAP1+MRH08+DCS57**

$Y = -3.313 \cdot \text{LOG}(X) + 22.40$ ; Eff. = 100.5%;  $R^2=0.997$

|             |       |
|-------------|-------|
| <i>oxyB</i> | 39.53 |
|             | 39.47 |
|             | 30.66 |
| <i>oxyK</i> | 29.4  |
|             | 32.1  |
|             | 28.6  |

**BAP1+MRH08+DCS58**

$Y = -3.364 \cdot \text{LOG}(X) + 24.24$ ; Eff. = 98.5%;  $R^2=0.997$

|             |       |
|-------------|-------|
| <i>oxyB</i> | No Ct |
|             | No Ct |
|             | 32.73 |
| <i>oxyK</i> | 26.89 |
|             | 26.28 |
|             | 32.57 |

**BAP1+MRH08+NDP6**

$Y = -3.27 \cdot \text{LOG}(X) + 18.29$ ; Eff. = 102.2%;  $R^2=1.00$

|             |       |
|-------------|-------|
| <i>oxyB</i> | 35    |
|             | 27.19 |
|             | 30.43 |
| <i>oxyK</i> | 23.31 |
|             | 24.73 |
|             | 23.33 |

**BAP1+MRH08+NDP7**

$Y = -3.145 \cdot \text{LOG}(X) + 16.20$ ; Eff. = 108.3%;  $R^2=0.995$

|             |       |
|-------------|-------|
| <i>oxyB</i> | 37.35 |
|             | 34.11 |
|             | No Ct |
| <i>oxyK</i> | 22.49 |
|             | 29.45 |
|             | 21.72 |

**BAP1+MRH08+DCS59**

$Y = -3.245 \cdot \text{LOG}(X) + 18.68$ ; Eff.= 103.6%;  $R^2=0.991$

|             |       |
|-------------|-------|
| <i>oxyB</i> | 34.61 |
|             | 23.63 |
|             | 27.26 |
| <i>oxyK</i> | 25.19 |

21.98

22.54

**BAP1+DCS61+DCS11**

$Y = -2.598 \cdot \text{LOG}(X) + 23.66$ ; Eff. = 142.6%;  $R^2=0.974$

*oxyB* 26.35

26.95

**BAP1+DCS62+DCS11**

$Y = -2.621 \cdot \text{LOG}(X) + 23.80$ ; Eff. = 140.7%;  $R^2=0.979$

*oxyB* 29.95

35.29
