# Supplementary material for: Alternative Sigma Factor Over-Expression Enables Heterologous Expression of a Type II Polyketide Biosynthetic Pathway in Escherichia coli
Source: PubMed Central journal article supplement (PMC3665592; doi:10.1371/journal.pone.0064858), 2013-05-28
Supplement: pone.0064858.s008.pdf [file pone.0064858.s008.pdf]

NC\_002755.2 *Mycobacterium tuberculosis* CDC1551, complete genome

| 1 | NRPS     | 105314-123821   |         |        |                   |        |          |                                                         |
|---|----------|-----------------|---------|--------|-------------------|--------|----------|---------------------------------------------------------|
|   |          | Distance        |         |        |                   |        |          |                                                         |
|   | Score    | From ORF        | N       | Strand | Sequence          | Gene   | Synonym  | Protein Name                                            |
|   | 75       | 430             | 106294  | +      | TTGGCAGCGCTTCGGCT | -      | MT0106   | dioxygenase, putative                                   |
|   | 75       | 157             | 106567  | +      | CTGGCAGTCAAGGTGCC | -      | MT0106   | dioxygenase, putative                                   |
|   | 81       | 323             | 109450  | +      | GTGGCGTGAACATTGCG | -      | MT0109   | hypothetical protein<br>cation transporter E1-E2 family |
|   | 81       | 325             | 122488  | -      | GTGGAATAGCACTTGCC | -      | MT0112   | ATPase                                                  |
|   | 81       | 60              | 122247  | +      | ATGGCCCGCTGGATGCA | -      | MT0113   | hypothetical protein                                    |
| 2 | PKS      | 485426-491388   |         |        |                   |        |          |                                                         |
| 3 | PKS      | 1313164-1328792 |         |        |                   |        |          |                                                         |
|   |          | Distance        |         |        |                   |        |          |                                                         |
|   | Score    | From ORF        | N       | Strand | Sequence          | Gene   | Synonym  | Protein Name                                            |
|   | 78       | 341             | 1327340 | -      | CTGGCTCAGACCCTGCG | -      | MT1222   | acyl-CoA synthetase                                     |
| 4 | PKS      | 1865066-1886258 |         |        |                   |        |          |                                                         |
|   |          | Distance        |         |        |                   |        |          |                                                         |
|   | Score    | From ORF        | N       | Strand | Sequence          | Gene   | Synonym  | Protein Name                                            |
|   | 78       | 121             | 1866089 | +      | CTGGCACTGATGCTGGA | -      | MT1701   | polyketide synthase                                     |
|   | 76       | 370             | 1878562 | +      | TTGCCACCGACCTTGAT | -      | MT1704   | polyketide synthase                                     |
| 5 | PKS      | 2294295-2309319 |         |        |                   |        |          |                                                         |
| 6 | NRPS/PKS | 2647576-2673168 |         |        |                   |        |          |                                                         |
|   |          | Distance        |         |        |                   |        |          |                                                         |
|   | Score    | From ORF        | N       | Strand | Sequence          | Gene   | Synonym  | Protein Name                                            |
|   | 75       | 344             | 2649233 | -      | CCGGCCCCCGCGTTGCC | -      | MT2439   | hypothetical protein                                    |
|   | 83       | 331             | 2651649 | -      | GAGGAACGCCTTTTGCT | dnaJ-2 | MT2442   | chaperone protein DnaJ                                  |
|   | 78       | 334             | 2673502 | -      | CTGGCAGCCGTTTGCA  | pchE   | MT2451   | dihydroaeruginic acid synthetase                        |
| 7 | PKS      | 3236513-3319822 |         |        |                   |        |          |                                                         |
|   |          | Distance        |         |        |                   |        |          |                                                         |
|   | Score    | From ORF        | N       | Strand | Sequence          | Gene   | Synonym  | Protein Name                                            |
|   | 76       | 385             | 3236128 | +      | TCGGCACGCCTCGGGCT | -      | MT2998   | thioesterase                                            |
|   | 75       | 1               | 3237290 | +      | TTCGCTGGACATTTGCT | -      | MT2998.1 | hypothetical protein                                    |
|   | 77       | 349             | 3256220 | +      | CTGGGACTCGACTCGCT | -      | MT3004   | polyketide synthase                                     |
|   | 78       | 23              | 3292184 | -      | GTGGCCGACCGTTTGCG | -      | MT3021.1 | polyketide synthase                                     |
|   | 77       | 323             | 3296988 | -      | ATGGCACGGCGCTGGCG | -      | MT3023   | acyl-CoA synthetase                                     |
|   | 79       | 490             | 3298272 | +      | TTGGCATCGATCTTGGG | -      | MT3026   | methyltransferase, putative                             |
|   | 78       | 477             | 3298285 | +      | TGGGCACGAATTCGCC  | -      | MT3026   | methyltransferase, putative                             |
|   | 77       | 104             | 3298658 | +      | CTGCCATACTCCTTGCC | -      | MT3026   | methyltransferase, putative                             |
|   | 82       | 353             | 3303494 | +      | GTGGCATGCTCATTCT  | -      | MT3031   | glycosyl transferase                                    |
|   | 76       | 44              | 3303803 | +      | GTGGCTGCGGTATTGCC | -      | MT3031   | glycosyl transferase                                    |
|   | 79       | 276             | 3306596 | -      | CTGGCAAGATCTTCGCC | -      | MT3034   | UDP-glucuronosyl and UDP-                               |
|   | 75       | 379             | 3308002 | -      | TTGGCCAGCTAGTTACT | -      | MT3036   | glucosyltransferase family protein                      |
|   | 76       | 106             | 3308155 | -      | GTGGCAGGGCCGTGAT  | -      | MT3037   | hypothetical protein                                    |
|   | 89       | 439             | 3311348 | +      | CTGGCACGCTACATGCA | -      | MT3041.1 | hypothetical protein                                    |

NC\_008611.1 *Mycobacterium ulcerans* Agy99, complete genome

| 1 | PKS   | 1803923-1835953 |         |        |                   |       |          |                          |
|---|-------|-----------------|---------|--------|-------------------|-------|----------|--------------------------|
|   |       | Distance        |         |        |                   |       |          |                          |
|   | Score | From ORF        | N       | Strand | Sequence          | Gene  | Synonym  | Protein Name             |
|   | 77    | 280             | 1820828 | +      | CTGGACAAGTTATTGCT | pkS11 | MUL_1656 | chalcone synthase, Pks11 |

|    |     |         |   |                    |       |          |                                                       |
|----|-----|---------|---|--------------------|-------|----------|-------------------------------------------------------|
| 75 | 91  | 1821017 | + | ATGTCACATGTGTTGAA  | pks11 | MUL_1656 | chalcone synthase, Pks11                              |
| 80 | 234 | 1834666 | - | ATGGTGCCGCGAGTTGCT | -     | MUL_1664 | hypothetical protein                                  |
| 75 | 443 | 1834875 | - | ACGGCACAGCATTTCG   | -     | MUL_1664 | hypothetical protein                                  |
| 75 | 322 | 1835436 | - | CTGGATCCCGTTTTCG   | -     | MUL_1665 | antibiotic resistance ABC transporter, efflux protein |

**2** PKS 2211634-2271101

| Score | Distance |         | Strand | Sequence          | Gene    | Synonym  | Protein Name                                                              |
|-------|----------|---------|--------|-------------------|---------|----------|---------------------------------------------------------------------------|
|       | From ORF | N       |        |                   |         |          |                                                                           |
| 75    | 133      | 2213368 | +      | CGGGCACACCGAGTGCG | -       | MUL_2003 | chorismate pyruvate-lyase                                                 |
| 78    | 133      | 2216250 | +      | GTGGCCGAACGGTTGCG | pks15/1 | MUL_2005 | polyketide synthase Pks15/1                                               |
| 79    | 305      | 2228469 | +      | GTGGCTCAACGGTGGCT | -       | MUL_2009 | methyltransferase                                                         |
| 75    | 67       | 2230104 | +      | GTGTCACACCGTTGAA  | mas     | MUL_2010 | multifunctional mycocerosic acid synthase membrane-associated Mas         |
| 78    | 354      | 2240002 | -      | ACGGCAAGATCATTGCC | drrB    | MUL_2013 | daunorubicin-DIM-transport integral membrane protein ABC transporter DrrB |
| 76    | 153      | 2240793 | -      | CTGGCGCGGTCGTTCCC | drrA    | MUL_2014 | daunorubicin-DIM-transport ATP-binding protein ABC transporter DrrA       |
| 77    | 288      | 2240928 | -      | TTGGCAATGCCGGTGCG | drrA    | MUL_2014 | daunorubicin-DIM-transport ATP-binding protein ABC transporter DrrA       |
| 84    | 178      | 2245274 | -      | GTGACACTGATTTTGA  | ppsE    | MUL_2015 | phenolphthiocerol synthesis type-I polyketide synthase PpsE               |
| 80    | 247      | 2250769 | -      | ATGGCCCTCGAGTTGCG | ppsD    | MUL_2016 | phenolphthiocerol synthesis type-I polyketide synthase PpsD               |
| 82    | 34       | 2257161 | -      | TTGGAACAGCTTCGCA  | ppsC    | MUL_2017 | phenolphthiocerol synthesis type-I polyketide synthase PpsC               |
| 76    | 121      | 2266630 | -      | GTGGCCGACGTCGTGCT | ppsA    | MUL_2019 | phenolphthiocerol synthesis type-I polyketide synthase PpsA               |

**3** NRPS 2921595-2959529

| Score | Distance |         | Strand | Sequence          | Gene   | Synonym  | Protein Name                     |
|-------|----------|---------|--------|-------------------|--------|----------|----------------------------------|
|       | From ORF | N       |        |                   |        |          |                                  |
| 79    | 76       | 2921519 | +      | TCGGCACGATAATTCCT | -      | MUL_2620 | hypothetical protein             |
| 80    | 216      | 2929670 | -      | ATGTGCGGGCATTGCT  | -      | MUL_2625 | hypothetical protein             |
| 81    | 92       | 2930909 | -      | CTGGCGCAGACCGTGCA | fadE25 | MUL_2626 | acyl-CoA dehydrogenase FadE25    |
| 75    | 87       | 2934800 | -      | GTCGCGCGGGATTGCC  | birA   | MUL_2631 | bifunctional protein BirA        |
| 76    | 286      | 2952542 | -      | GTGGCAGACCTGCGGCT | sigF   | MUL_2640 | RNA polymerase sigma factor SigF |
| 83    | 205      | 2953689 | -      | GTGGCACGGCGCCGCT  | usfY   | MUL_2642 | hypothetical protein             |

**4** NRPS/PKS 4029686-4059363

| Score | Distance |         | Strand | Sequence          | Gene    | Synonym  | Protein Name                                                    |
|-------|----------|---------|--------|-------------------|---------|----------|-----------------------------------------------------------------|
|       | From ORF | N       |        |                   |         |          |                                                                 |
| 76    | 385      | 4033562 | -      | TTGGACTACGGCTTGCT | mbtB    | MUL_3632 | phenylloxazoline synthase MbtB non-ribosomal peptide synthetase |
| 75    | 397      | 4038148 | -      | CTGGCCCCACCGCTGCC | mbtF    | MUL_3633 | MbtF                                                            |
| 75    | 61       | 4042974 | +      | GTTGAATGGCTGTTGCG | -       | MUL_3635 | hypothetical protein                                            |
| 76    | 245      | 4044260 | +      | CTGGCACTTCGCGTGAT | mbtC    | MUL_3637 | polyketide synthase MbtC                                        |
| 76    | 56       | 4050456 | -      | ATGGCAACGCTATTACC | mbtG    | MUL_3640 | lysine-N-oxygenase MbtG short-chain membrane-associated         |
| 80    | 31       | 4053325 | +      | ATCGCAGGCTCATTGCA | -       | MUL_3643 | dehydrogenase acyl-[acyl-carrier protein] desaturase            |
| 75    | 317      | 4057245 | -      | CTGGCTCGGCAGCGGCA | desA1_1 | MUL_3646 | DesA1_1                                                         |

|   |       |                 |         |        |                   |      |          |                      |
|---|-------|-----------------|---------|--------|-------------------|------|----------|----------------------|
| 5 | NRPS  | 4833556-4838804 |         |        |                   |      |          |                      |
| 6 | NRPS  | 5377263-5405727 |         |        |                   |      |          |                      |
|   |       | Distance        |         |        |                   |      |          |                      |
|   | Score | From ORF        | N       | Strand | Sequence          | Gene | Synonym  | Protein Name         |
|   | 77    | 255             | 5378620 | +      | ACGGCACCAGCACTGCT | -    | MUL_4854 | oxidoreductase       |
|   | 75    | 467             | 5379274 | +      | CTGGCCAAGGTTTGGA  | -    | MUL_4855 | hypothetical protein |
|   | 84    | 398             | 5391216 | -      | TCGGCCCGGATATTGCT | -    | MUL_4861 | hypothetical protein |
|   | 83    | 199             | 5396076 | -      | ATGGCAATGACGTTGCG | -    | MUL_4867 | hypothetical protein |
| 7 | PKS   | 5523988-5532849 |         |        |                   |      |          |                      |

**NC\_006361.1 Nocardia farcinica IFM 10152, complete genome**

|   |          |                 |         |        |                   |      |          |                                           |
|---|----------|-----------------|---------|--------|-------------------|------|----------|-------------------------------------------|
| 1 | PKS      | 184410-208907   |         |        |                   |      |          |                                           |
|   |          | Distance        |         |        |                   |      |          |                                           |
|   | Score    | From ORF        | N       | Strand | Sequence          | Gene | Synonym  | Protein Name                              |
|   | 78       | 160             | 207612  | +      | GTGGCGCCGTCGGTGCT | -    | nfa1980  | hypothetical protein                      |
| 2 | NRPS     | 742402-783087   |         |        |                   |      |          |                                           |
|   |          | Distance        |         |        |                   |      |          |                                           |
|   | Score    | From ORF        | N       | Strand | Sequence          | Gene | Synonym  | Protein Name                              |
|   | 78       | 5               | 782060  | +      | GTGGCACGCGTGCCGCG | -    | nfa7210  | putative esterase                         |
| 3 | NRPS/PKS | 809229-843740   |         |        |                   |      |          |                                           |
|   |          | Distance        |         |        |                   |      |          |                                           |
|   | Score    | From ORF        | N       | Strand | Sequence          | Gene | Synonym  | Protein Name                              |
|   | 75       | 426             | 815841  | -      | GTGGGCCAACAACTGCT | -    | nfa7550  | putative ATP-dependent protease           |
|   | 78       | 324             | 816789  | -      | CTGGCCTGGGCGGTGCT | amiE | nfa7560  | acylamide amidohydrolase                  |
|   | 78       | 239             | 820253  | -      | TTGGCGCAACACGTGCG | -    | nfa7600  | hypothetical protein                      |
|   | 80       | 307             | 820321  | -      | CTGGCGAGCCAGTTGCC | -    | nfa7600  | hypothetical protein                      |
|   | 76       | 231             | 827277  | +      | CTGGCCGAGCGGATGCT | nbtD | nfa7660  | putative non-ribosomal peptide synthetase |
|   | 76       | 64              | 837122  | +      | CTGGCCGAGCTGTGGCA | nbtF | nfa7680  | putative non-ribosomal peptide synthetase |
| 4 | NRPS     | 1219367-1235955 |         |        |                   |      |          |                                           |
|   |          | Distance        |         |        |                   |      |          |                                           |
|   | Score    | From ORF        | N       | Strand | Sequence          | Gene | Synonym  | Protein Name                              |
|   | 77       | 475             | 1218892 | +      | CTGGCCCGTTGCTGCG  | -    | nfa11040 | hypothetical protein                      |
| 5 | NRPS     | 2965856-2985159 |         |        |                   |      |          |                                           |
| 6 | PKS      | 3189119-3223839 |         |        |                   |      |          |                                           |
|   |          | Distance        |         |        |                   |      |          |                                           |
|   | Score    | From ORF        | N       | Strand | Sequence          | Gene | Synonym  | Protein Name                              |
|   | 76       | 247             | 3191679 | -      | CTGGCGCTGGTGCTGCG | -    | nfa30090 | putative iron-sulfur oxidoreductase       |
|   | 75       | 103             | 3193577 | -      | CTAGCGCGCGGATTGCG | -    | nfa30110 | putative monooxygenase                    |
|   | 75       | 380             | 3193854 | -      | GTGGCATCCTGGTGCC  | -    | nfa30110 | putative monooxygenase                    |
|   | 76       | 406             | 3195498 | -      | CTGGGGCAGTGATTGCG | -    | nfa30120 | acyl-CoA synthetase                       |
|   | 75       | 62              | 3198518 | +      | CCGGCAAGCGCATGCT  | -    | nfa30170 | hypothetical protein                      |
|   | 76       | 56              | 3202150 | +      | ATTGCTGGAATATTGCT | -    | nfa30220 | putative sigma factor                     |
|   | 75       | 459             | 3212616 | -      | CTGGCGGACCAACTGCT | -    | nfa30250 | putative polyketide synthase              |
|   | 76       | 221             | 3220860 | -      | CTGGACTTCTGTTGCT  | -    | nfa30320 | hypothetical protein                      |
| 7 | NRPS     | 3297940-3312573 |         |        |                   |      |          |                                           |
|   |          | Distance        |         |        |                   |      |          |                                           |
|   | Score    | From ORF        | N       | Strand | Sequence          | Gene | Synonym  | Protein Name                              |

|           |                             |         |        |                   |      |          |                                              |
|-----------|-----------------------------|---------|--------|-------------------|------|----------|----------------------------------------------|
| 78        | 179                         | 3299108 | -      | GTGGCCGGGACCGTGCA | -    | nfa31160 | putative ABC transporter ATP-binding protein |
| 77        | 296                         | 3299225 | -      | CTGGCGCGGGACTTCCG | -    | nfa31160 | putative ABC transporter ATP-binding protein |
| <b>8</b>  | <b>PKS 4478704-4491458</b>  |         |        |                   |      |          |                                              |
|           | Distance                    |         |        |                   |      |          |                                              |
| Score     | From ORF                    | N       | Strand | Sequence          | Gene | Synonym  | Protein Name                                 |
| 76        | 338                         | 4489377 | -      | ATGGCACAGGTGGCGCC | -    | nfa43240 | putative polyketide synthase                 |
| 77        | 493                         | 4491951 | -      | CCGGCAACGCACTTGCC | -    | nfa43260 | putative transporter                         |
| <b>9</b>  | <b>NRPS 5244714-5291138</b> |         |        |                   |      |          |                                              |
| <b>10</b> | <b>NRPS 5318160-5361768</b> |         |        |                   |      |          |                                              |
| <b>11</b> | <b>PKS 5919882-5934805</b>  |         |        |                   |      |          |                                              |
|           | Distance                    |         |        |                   |      |          |                                              |
| Score     | From ORF                    | N       | Strand | Sequence          | Gene | Synonym  | Protein Name                                 |
| 80        | 97                          | 5923205 | +      | GCGGCACGTGAGCTGCT | -    | nfa55870 | hypothetical protein                         |
| 79        | 153                         | 5926963 | -      | GTGGCACGACCGTGCCA | -    | nfa55900 | long-chain-fatty-acid--CoA ligase            |
| 78        | 189                         | 5926962 | +      | ATGGCACGGTCGTGCCA | -    | nfa55910 | putative dioxygenase                         |

**NC\_009142.1 Saccharopolyspora erythraea NRRL 2338, complete genome**

|          |                                 |         |        |                   |        |           |                                                              |
|----------|---------------------------------|---------|--------|-------------------|--------|-----------|--------------------------------------------------------------|
| <b>1</b> | <b>PKS 14813-51921</b>          |         |        |                   |        |           |                                                              |
|          | Distance                        |         |        |                   |        |           |                                                              |
| Score    | From ORF                        | N       | Strand | Sequence          | Gene   | Synonym   | Protein Name                                                 |
| 81       | 175                             | 15677   | -      | TTGGCCGGGCCGTTGCG | -      | SACE_0012 | TetR family transcriptional regulator                        |
| 76       | 129                             | 49054   | +      | GCGGCCCGGCTCTTCT  | -      | SACE_0029 | RNA polymerase sigma factor                                  |
| <b>2</b> | <b>PKS 778214-832825</b>        |         |        |                   |        |           |                                                              |
|          | Distance                        |         |        |                   |        |           |                                                              |
| Score    | From ORF                        | N       | Strand | Sequence          | Gene   | Synonym   | Protein Name                                                 |
| 76       | 328                             | 783452  | -      | CTGGCGCTACGGTGCA  | eryCIV | SACE_0716 | eryCIV NDP-6-deoxyhexose 3,4-dehydratase                     |
| 76       | 128                             | 784712  | -      | CTGGCACAGGTGATCCG | eryBVI | SACE_0717 | NDP-4-keto-6-deoxy-glucose 2,3-dehydratase                   |
| 77       | 362                             | 787113  | -      | GTGGCACGACGGCGGCG | eryBV  | SACE_0719 | 6-DEB TDP-mycarosyl glycosyltransferase                      |
| 81       | 224                             | 831762  | -      | GAGGTACGGCTTGCA   | ermE   | SACE_0733 | N-6-aminoadenine-N-methyltransferase,erythromycin resistance |
| <b>3</b> | <b>NRPS 1436967-1445722</b>     |         |        |                   |        |           |                                                              |
| <b>4</b> | <b>PKS 2528343-2549947</b>      |         |        |                   |        |           |                                                              |
|          | Distance                        |         |        |                   |        |           |                                                              |
| Score    | From ORF                        | N       | Strand | Sequence          | Gene   | Synonym   | Protein Name                                                 |
| 76       | 242                             | 2528101 | +      | GTGGACCGGCAGTTGGT | cmtC   | SACE_2339 | trehalose corynomocolyl transferase C                        |
| <b>5</b> | <b>PKS 2795362-2818679</b>      |         |        |                   |        |           |                                                              |
|          | Distance                        |         |        |                   |        |           |                                                              |
| Score    | From ORF                        | N       | Strand | Sequence          | Gene   | Synonym   | Protein Name                                                 |
| 76       | 132                             | 2798967 | -      | TCGGCACGCGACTTGGG | -      | SACE_2592 | glucose-methanol-choline oxidoreductase                      |
| 80       | 116                             | 2800190 | -      | CTGGCGCACCGGGTGCT | -      | SACE_2593 | glycopeptide antibiotics resistance protein                  |
| <b>6</b> | <b>NRPS/PKS 2838066-2886848</b> |         |        |                   |        |           |                                                              |

| Score     | Distance    |                        | Strand | Sequence          | Gene | Synonym   | Protein Name                                                 |
|-----------|-------------|------------------------|--------|-------------------|------|-----------|--------------------------------------------------------------|
|           | From ORF    | N                      |        |                   |      |           |                                                              |
| 81        | 433         | 2844648                | -      | GTGGCGCAGGTGCTGCA | -    | SACE_2619 | non-ribosomal peptide synthetase                             |
| 79        | 322         | 2855647                | -      | GAGGCACTGCGCCTGCT | -    | SACE_2627 | isopentenyl-diphosphate delta-isomerase II 2                 |
| 77        | 316         | 2883545                | -      | GTGGCGCTGGCGCTGCA | -    | SACE_2635 | major facilitator superfamily transporter phthalate permease |
| <b>7</b>  | <b>NRPS</b> | <b>2944491-2974637</b> |        |                   |      |           |                                                              |
| Score     | Distance    |                        | Strand | Sequence          | Gene | Synonym   | Protein Name                                                 |
| From ORF  | N           |                        |        |                   |      |           |                                                              |
| 75        | 112         | 2962692                | +      | GTGGAACGCGCCGCGCA | -    | SACE_2698 | putative regulatory protein                                  |
| 76        | 63          | 2974297                | +      | GTGGCACGCGCGCGCC  | -    | SACE_2709 | hypothetical protein                                         |
| <b>8</b>  | <b>PKS</b>  | <b>3127652-3157229</b> |        |                   |      |           |                                                              |
| Score     | Distance    |                        | Strand | Sequence          | Gene | Synonym   | Protein Name                                                 |
| From ORF  | N           |                        |        |                   |      |           |                                                              |
| 76        | 284         | 3131486                | -      | TCGGCACGGTGTTCGCC | rifI | SACE_2867 | aminoquinolate/shikimate dehydrogenase                       |
| 79        | 195         | 3138945                | +      | GTGCCATTCCGGTTGCT | -    | SACE_2875 | modular polyketide synthase                                  |
| 77        | 158         | 3138982                | +      | CAGGCATCGAGTTGCG  | -    | SACE_2875 | modular polyketide synthase                                  |
| 78        | 428         | 3151884                | +      | CTGGCGCACGTGTTCT  | mhpA | SACE_2877 | 3-(3-hydroxyphenyl)propionate hydroxylase                    |
| 77        | 240         | 3152072                | +      | CTGGCACGGCCTCTACC | mhpA | SACE_2877 | 3-(3-hydroxyphenyl)propionate hydroxylase                    |
| <b>9</b>  | <b>NRPS</b> | <b>3301269-3308199</b> |        |                   |      |           |                                                              |
| Score     | Distance    |                        | Strand | Sequence          | Gene | Synonym   | Protein Name                                                 |
| From ORF  | N           |                        |        |                   |      |           |                                                              |
| 77        | 55          | 3307140                | +      | ACGGCGCGGATCGTGCT | -    | SACE_3016 | SyrP-like protein                                            |
| <b>10</b> | <b>NRPS</b> | <b>3326161-3344964</b> |        |                   |      |           |                                                              |
| Score     | Distance    |                        | Strand | Sequence          | Gene | Synonym   | Protein Name                                                 |
| From ORF  | N           |                        |        |                   |      |           |                                                              |
| 85        | 242         | 3325919                | +      | GTGGCCAGGCGTTGCT  | -    | SACE_3033 | putative peptide monooxygenase                               |
| <b>11</b> | <b>PKS</b>  | <b>4545937-4616845</b> |        |                   |      |           |                                                              |
| Score     | Distance    |                        | Strand | Sequence          | Gene | Synonym   | Protein Name                                                 |
| From ORF  | N           |                        |        |                   |      |           |                                                              |
| 75        | 59          | 4554457                | +      | TTGACTAGAGTGTGCT  | -    | SACE_4130 | hypothetical protein                                         |
| 78        | 290         | 4559173                | +      | ATGGCCTCGCGTTGCC  | -    | SACE_4132 | acyl carrier protein                                         |
| 86        | 49          | 4563179                | +      | TGGGCACCGCCCTTGCT | -    | SACE_4135 | MaoC-like dehydratase                                        |
| 80        | 259         | 4572145                | -      | CTGGCCGGCACCTGCT  | -    | SACE_4138 | type I PKS modular polyketide synthas                        |
| 78        | 417         | 4588385                | -      | GTGGAACAGGCCTTCCA | -    | SACE_4139 | type I modular polyketide synthase                           |
| 75        | 146         | 4612861                | -      | GTGGCGCTGCGCTGCC  | -    | SACE_4142 | cytochrome P450 monooxygenase                                |
| 75        | 251         | 4612966                | -      | CTGGCTCGGATGGAGCT | -    | SACE_4142 | cytochrome P450 monooxygenase                                |
| 83        | 27          | 4614155                | -      | ATGGCAGGGAAGTTCCT | -    | SACE_4143 | cytochrome P450 monooxygenase                                |
| <b>12</b> | <b>NRPS</b> | <b>4759004-4809694</b> |        |                   |      |           |                                                              |
| Score     | Distance    |                        | Strand | Sequence          | Gene | Synonym   | Protein Name                                                 |
| From ORF  | N           |                        |        |                   |      |           |                                                              |
| 78        | 475         | 4772132                | -      | CTGGCCCGGGCGCTGCG | -    | SACE_4285 | AMP-dependent synthetase and ligase                          |

|           |       |                   |         |        |                   |       |           |                                               |
|-----------|-------|-------------------|---------|--------|-------------------|-------|-----------|-----------------------------------------------|
|           | 76    | 498               | 4772155 | -      | GTGGCGCGCTGCTGGCC | -     | SACE_4285 | AMP-dependent synthetase and ligase           |
| <b>13</b> | PKS   | 4821866-4828194   |         |        |                   |       |           |                                               |
| <b>14</b> | PKS   | 4992823-5006652   |         |        |                   |       |           |                                               |
|           | Score | Distance From ORF | N       | Strand | Sequence          | Gene  | Synonym   | Protein Name                                  |
|           | 75    | 183               | 4996606 | -      | GTGGACCGCCCGGTGCA | -     | SACE_4472 | NAD-dependent epimerase/dehydratase           |
|           | 79    | 82                | 4997888 | -      | GTGGCGCTGAAGCTGCT | qor   | SACE_4474 | quinone oxidoreductase                        |
| <b>15</b> | PKS   | 5102367-5117363   |         |        |                   |       |           |                                               |
|           | Score | Distance From ORF | N       | Strand | Sequence          | Gene  | Synonym   | Protein Name                                  |
|           | 79    | 327               | 5106524 | +      | CTGCGACGCGCCTGCA  | -     | SACE_4566 | hypothetical protein                          |
|           | 78    | 359               | 5112790 | +      | GTGCCGCAACGTTTGCT | pteA1 | SACE_4574 | modular polyketide synthase                   |
| <b>16</b> | PKS   | 5932907-5941187   |         |        |                   |       |           |                                               |
|           | Score | Distance From ORF | N       | Strand | Sequence          | Gene  | Synonym   | Protein Name                                  |
|           | 78    | 213               | 5933803 | +      | CGGCCACGCCGTTGCA  | chlB1 | SACE_5308 | iterative type I polyketide synthase          |
| <b>17</b> | PKS   | 6225358-6248235   |         |        |                   |       |           |                                               |
|           | Score | Distance From ORF | N       | Strand | Sequence          | Gene  | Synonym   | Protein Name                                  |
|           | 78    | 287               | 6239374 | -      | TCGGCACCGCTCTCCA  | -     | SACE_5540 | 3-oxoacyl (acyl carrier protein) synthase III |

#### NC\_009380.1 *Salinispora tropica* CNB-440, complete genome

|          |          |                   |         |        |                   |      |            |                                |
|----------|----------|-------------------|---------|--------|-------------------|------|------------|--------------------------------|
| <b>1</b> | PKS      | 671414-679577     |         |        |                   |      |            |                                |
|          | Score    | Distance From ORF | N       | Strand | Sequence          | Gene | Synonym    | Protein Name                   |
|          | 75       | 214               | 671873  | +      | TTGGAACGAAACGAGCT | -    | Strop_0597 | hypothetical protein           |
|          | 83       | 374               | 672939  | +      | ATGGCTGGCACGTTGCT | -    | Strop_0598 | beta-ketoacyl synthase         |
| <b>2</b> | NRPS/PKS | 144505-1172682    |         |        |                   |      |            |                                |
|          | Score    | Distance From ORF | N       | Strand | Sequence          | Gene | Synonym    | Protein Name                   |
|          | 79       | 296               | 1150310 | -      | CTGGCATGCCTCCGGCA | -    | Strop_1020 | MbtH domain-containing protein |
|          | 82       | 296               | 1164400 | +      | GTGGCATGGCCTATGCC | -    | Strop_1028 | hypothetical protein           |
|          | 76       | 157               | 1164539 | +      | CTGGCCGGCCGATCGCT | -    | Strop_1028 | hypothetical protein           |
|          | 78       | 220               | 1165260 | +      | CTGCCACGGCTGCTGCC | -    | Strop_1029 | cyclase family protein         |
|          | 81       | 438               | 1167460 | -      | CTGGCACAGATAGCGCT | -    | Strop_1030 | regulatory protein, LuxR       |
| <b>3</b> | PKS      | 2502319-2520690   |         |        |                   |      |            |                                |
|          | Score    | Distance From ORF | N       | Strand | Sequence          | Gene | Synonym    | Protein Name                   |
|          | 76       | 33                | 2505275 | -      | TGGGCACAAAGCCTGCG | -    | Strop_2212 | TAP domain-containing protein  |
|          | 75       | 447               | 2507023 | -      | GCGGCACCCTGTTGAT  | -    | Strop_2213 | hypothetical protein           |
|          | 78       | 480               | 2513894 | -      | ATGGGACTGACCTCGCT | -    | Strop_2220 | hypothetical protein           |
|          | 83       | 411               | 2514406 | +      | CTGGTAGAGCAGTTGCA | -    | Strop_2222 | dTDP-glucose 4,6-dehydratase   |
|          | 75       | 1                 | 2517088 | +      | TGGGCACGGTCCGGCA  | -    | Strop_2224 | beta-ketoacyl synthase         |
|          | 76       | 463               | 2519253 | +      | GCGGCCGCCCCGTTGCT | -    | Strop_2227 | hypothetical protein           |
| <b>4</b> | PKS      | 2795012-2816666   |         |        |                   |      |            |                                |
|          | Score    | Distance From ORF | N       | Strand | Sequence          | Gene | Synonym    | Protein Name                   |

|    |     |         |   |                   |   |            |                                                                       |
|----|-----|---------|---|-------------------|---|------------|-----------------------------------------------------------------------|
| 75 | 433 | 2798754 | - | CTGGTCGAACTCTTGCG | - | Strop_2487 | dehydrogenase, E1 component<br>AMP-dependent synthetase and<br>ligase |
| 76 | 124 | 2804213 | - | GAGGCCGACCTGTTGCT | - | Strop_2492 | beta-ketoacyl synthase                                                |
| 81 | 84  | 2805809 | - | CTGGCCTGGCTTGTGCA | - | Strop_2494 | antibiotic biosynthesis<br>monooxygenase                              |
| 80 | 205 | 2809136 | - | GTGGCCACCGTGTGCT  | - | Strop_2498 | cupin 2 domain-containing protein                                     |
| 77 | 357 | 2812320 | - | GTGGCCGAGATCCTGCA | - | Strop_2501 | acetyl-CoA carboxylase, biotin<br>carboxyl carrier protein            |
| 77 | 112 | 2814752 | - | CTGGCCGACCTGGTGCC | - | Strop_2504 |                                                                       |

**5 NRPS/PKS 2956815-2996840**

| Score | Distance |         | Strand | Sequence          | Gene | Synonym    | Protein Name                                                                                          |
|-------|----------|---------|--------|-------------------|------|------------|-------------------------------------------------------------------------------------------------------|
|       | From ORF | N       |        |                   |      |            |                                                                                                       |
| 78    | 393      | 2974666 | -      | TTGGCCGAGCTCTGGCC | -    | Strop_2648 | methyltransferase type 12                                                                             |
| 80    | 85       | 2977211 | -      | CTGGCACCCGCGTGCC  | -    | Strop_2650 | ABC transporter related<br>binding-protein-dependent<br>transport systems inner membrane<br>component |
| 75    | 466      | 2979339 | -      | CTGGCGTTGACCCTGCA | -    | Strop_2652 | hypothetical protein                                                                                  |
| 77    | 150      | 2996990 | -      | TTGGCCAAGCAAGTGCT | -    | Strop_2659 |                                                                                                       |

**6 PKS 3020222-3042851**

| Score | Distance |         | Strand | Sequence          | Gene | Synonym    | Protein Name                                                                     |
|-------|----------|---------|--------|-------------------|------|------------|----------------------------------------------------------------------------------|
|       | From ORF | N       |        |                   |      |            |                                                                                  |
| 76    | 204      | 3023263 | -      | GTGGCCTGGTTCTGGCC | -    | Strop_2686 | alpha amylase, catalytic region<br>helix-turn-helix domain-containing<br>protein |
| 75    | 322      | 3025145 | -      | TTGGCATGTGGTGCCT  | -    | Strop_2688 | hypothetical protein                                                             |
| 75    | 330      | 3026030 | -      | GCGGCACCGCGTTGTT  | -    | Strop_2689 | hypothetical protein                                                             |
| 76    | 207      | 3027623 | -      | ACGGCCCTCTCGTGCT  | -    | Strop_2691 | hypothetical protein<br>flavin reductase domain-containing<br>protein            |
| 81    | 377      | 3031869 | -      | TTGGCAGGGCCGGTGCC | -    | Strop_2695 | beta-ketoacyl synthase                                                           |
| 77    | 192      | 3037925 | -      | CTGGCGTGGCCTCGCA  | -    | Strop_2697 | hypothetical protein                                                             |
| 76    | 235      | 3043086 | -      | ATGGCACGGGTGTTCTC | -    | Strop_2701 |                                                                                  |

**7 NRPS/PKS 3112454-3249126**

| Score | Distance |         | Strand | Sequence          | Gene | Synonym    | Protein Name                                                   |
|-------|----------|---------|--------|-------------------|------|------------|----------------------------------------------------------------|
|       | From ORF | N       |        |                   |      |            |                                                                |
| 75    | 422      | 3116359 | +      | ACGGCATGAGCGTCGCA | -    | Strop_2766 | regulatory protein, TetR                                       |
| 75    | 117      | 3141159 | -      | CTGGTCCGGCTGGTGCC | -    | Strop_2770 | cytochrome P450                                                |
| 80    | 282      | 3142490 | +      | CTGGCCCGACCGTGCG  | -    | Strop_2772 | aminotransferase, class I and II                               |
| 76    | 440      | 3143585 | +      | CTGGCCGGCCGATGCA  | -    | Strop_2773 | hypothetical protein                                           |
| 76    | 344      | 3143681 | +      | GTGGCCGGCGCCGTGCA | -    | Strop_2773 | hypothetical protein<br>AMP-dependent synthetase and<br>ligase |
| 77    | 410      | 3144589 | +      | TTGGCCGACGGCTGCG  | -    | Strop_2774 | beta-ketoacyl synthase                                         |
| 79    | 25       | 3160851 | -      | CTGGCAACGAGTTTGGT | -    | Strop_2778 | acyl transferase domain-containing<br>protein                  |
| 85    | 327      | 3165966 | -      | CTGGCCCGCACCTGCT  | -    | Strop_2779 | hypothetical protein                                           |
| 76    | 471      | 3188122 | -      | GCGGCACGCCGATCGCC | -    | Strop_2785 | AMP-dependent synthetase and<br>ligase                         |
| 77    | 312      | 3190952 | -      | AGGGCAAGCGGATTGCC | -    | Strop_2787 | alpha/beta hydrolase fold                                      |
| 75    | 112      | 3193950 | -      | CTGGCCGCGACCTGCT  | -    | Strop_2791 | alpha/beta hydrolase fold                                      |
| 75    | 303      | 3194141 | -      | CTGGCCGACCCGCTGCT | -    | Strop_2791 | beta-ketoacyl synthase                                         |
| 78    | 427      | 3198676 | -      | TTGGCACTCTCATGGCC | -    | Strop_2795 | phosphopantetheine-binding                                     |
| 78    | 168      | 3198676 | -      | TTGGCACTCTCATGGCC | -    | Strop_2796 | phosphopantetheine-binding                                     |
| 79    | 373      | 3198881 | -      | GCGGCACTGCTCTGGCT | -    | Strop_2796 | phosphopantetheine-binding                                     |
| 75    | 470      | 3198978 | -      | CGGGAACGAGCCCTGCT | -    | Strop_2796 | L-carnitine dehydratase/bile acid-<br>inducible protein F      |
| 75    | 370      | 3201972 | -      | CAGGCACGGCTGCGGCA | -    | Strop_2800 | AMP-dependent synthetase and<br>ligase                         |
| 76    | 7        | 3203132 | +      | CTGGCACTCTGGAGGCT | -    | Strop_2803 |                                                                |

|    |     |         |   |                   |   |            |                               |
|----|-----|---------|---|-------------------|---|------------|-------------------------------|
| 78 | 466 | 3212075 | + | CTGGCGCTGGAGGTGCT | - | Strop_2809 | hypothetical protein          |
| 78 | 205 | 3222961 | - | CGGGCACTGCGGGTGCT | - | Strop_2817 | thioesterase                  |
| 75 | 410 | 3224293 | - | GTGGCTCGACTGGTACT | - | Strop_2818 | thiazolinylyl imide reductase |
| 78 | 126 | 3241571 | - | GCGCCACAGGACTTGCT | - | Strop_2825 | cytochrome P450               |

8 PKS 3475927-3510099

9 NRPS 4996301-5013814

| Score | Distance |         | Strand | Sequence          | Gene | Synonym    | Protein Name                                                               |
|-------|----------|---------|--------|-------------------|------|------------|----------------------------------------------------------------------------|
|       | From ORF | N       |        |                   |      |            |                                                                            |
| 80    | 426      | 4997797 | -      | GTGGCCCCGCTCTTCT  | -    | Strop_4414 | methyltransferase type 12 amino acid adenylation domain-containing protein |
| 84    | 166      | 5003350 | -      | ATGGCCCGCGCGTTGCG | -    | Strop_4416 | containing protein                                                         |
| 79    | 496      | 5009133 | -      | CTGGCCCGCGGCTGCG  | -    | Strop_4419 | kynurenine 3-monooxygenase                                                 |

NC\_003155.4 *Streptomyces avermitilis* MA-4680, complete genome

1 PKS 113361-118594

2 PKS 486648-567017

| Score | Distance |        | Strand | Sequence           | Gene  | Synonym | Protein Name                          |
|-------|----------|--------|--------|--------------------|-------|---------|---------------------------------------|
|       | From ORF | N      |        |                    |       |         |                                       |
| 76    | 157      | 490476 | -      | TTGGCAAGAAAGCGGCA  | pteF  | SAV_409 | LuxR family transcriptional regulator |
| 77    | 370      | 567387 | -      | CTGGCCGAGATTTTCGCA | pteA1 | SAV_419 | modular polyketide synthase           |

3 NRPS 751402-762285

4 NRPS/PKS 991484-1042269

| Score | Distance |         | Strand | Sequence          | Gene     | Synonym | Protein Name                        |
|-------|----------|---------|--------|-------------------|----------|---------|-------------------------------------|
|       | From ORF | N       |        |                   |          |         |                                     |
| 75    | 136      | 992855  | -      | CGGGTGCGTCTGTTGCT | cyp4     | SAV_838 | cytochrome P450                     |
| 77    | 39       | 1002360 | -      | CTGGCCCGCGGTTGGC  | -        | SAV_845 | modular polyketide synthase         |
| 75    | 51       | 1021253 | -      | CTGGCACACAAAGAGCG | nrps7-8  | SAV_855 | non-ribosomal peptide synthetase    |
| 76    | 223      | 1022254 | -      | TTGGCCGAGGACGTGCT | -        | SAV_856 | thioesterase                        |
| 87    | 293      | 1024835 | +      | CTGGCACGGCCCTTCCA | nrps7-10 | SAV_859 | non-ribosomal peptide synthetase    |
| 81    | 433      | 1026118 | +      | TTGGCCGCGGGCGTGCA | nrps7-11 | SAV_860 | non-ribosomal peptide synthetase    |
| 79    | 488      | 1036207 | +      | GTGGCAGGCGAACTGCC | -        | SAV_867 | ABC transporter ATP-binding protein |

5 PKS 1132045-1212960

| Score | Distance |         | Strand | Sequence          | Gene     | Synonym | Protein Name                               |
|-------|----------|---------|--------|-------------------|----------|---------|--------------------------------------------|
|       | From ORF | N       |        |                   |          |         |                                            |
| 75    | 76       | 1168427 | +      | ATGGCACCGCACCCGCC | aveC     | SAV_940 | AveC                                       |
| 75    | 111      | 1208710 | -      | CAGGCCCGCACCTGCT  | aveBV    | SAV_949 | dTDP-4-keto-6-deoxyhexose 3,5-epimerase    |
| 76    | 410      | 1212380 | -      | ACGGCCCGGATACTGCA | aveBVIII | SAV_952 | dTDP-4-keto-6-deoxy-L-hexose 2,3-reductase |
| 77    | 281      | 1211927 | +      | GGAGCACTGCTGTTGCT | aveG     | SAV_953 | thioesterase                               |
| 75    | 114      | 1212094 | +      | GTGGGACACGGGCTGCC | aveG     | SAV_953 | thioesterase                               |

6 PKS 1549424-1554224

7 PKS 1893266-1913284

| Score | Distance |         | Strand | Sequence          | Gene   | Synonym  | Protein Name                     |
|-------|----------|---------|--------|-------------------|--------|----------|----------------------------------|
|       | From ORF | N       |        |                   |        |          |                                  |
| 78    | 263      | 1910520 | -      | GCGGTACGCCAGTTGCC | pks2-2 | SAV_1551 | modular polyketide synthase      |
| 76    | 443      | 1912725 | -      | CTGGCCCTCTTGTGCG  | pks2-3 | SAV_1552 | non-ribosomal peptide synthetase |
| 76    | 354      | 1912250 | +      | CTGGTGCAGGCGTGCT  | -      | SAV_1553 | methyltransferase                |



|    |       |                 |         |        |                   |         |          |                                        |
|----|-------|-----------------|---------|--------|-------------------|---------|----------|----------------------------------------|
| 8  | PKS   | 2773878-2784841 |         |        |                   |         |          |                                        |
| 9  | PKS   | 2877941-2894413 |         |        |                   |         |          |                                        |
| 10 | PKS   | 2896543-2914291 |         |        |                   |         |          |                                        |
|    |       | Distance        |         |        |                   |         |          |                                        |
|    | Score | From ORF        | N       | Strand | Sequence          | Gene    | Synonym  | Protein Name                           |
|    | 81    | 339             | 2904983 | -      | CTGGCACCGCTCACGCT | -       | SAV_2378 | polyketide oxidase/hydroxylase         |
|    | 75    | 296             | 2906293 | +      | ACGGCCCGCCCGCTGCT | -       | SAV_2381 | TetR family transcriptional regulator  |
| 11 | PKS   | 3477658-3493243 |         |        |                   |         |          |                                        |
|    |       | Distance        |         |        |                   |         |          |                                        |
|    | Score | From ORF        | N       | Strand | Sequence          | Gene    | Synonym  | Protein Name                           |
|    | 77    | 112             | 3491806 | -      | CTGGCCCTGTTCTGCC  | -       | SAV_2846 | hypothetical protein                   |
|    | 75    | 159             | 3492602 | -      | GAGGCACCCCTTCTGCG | -       | SAV_2847 | hypothetical protein                   |
|    | 77    | 210             | 3493453 | -      | ACGGCCAGCACCTTGCT | -       | SAV_2849 | hypothetical protein                   |
| 12 | PKS   | 3534525-3634592 |         |        |                   |         |          |                                        |
|    |       | Distance        |         |        |                   |         |          |                                        |
|    | Score | From ORF        | N       | Strand | Sequence          | Gene    | Synonym  | Protein Name                           |
|    | 77    | 17              | 3630164 | -      | ATGGCGCGGCTCGCGCA | olmRII  | SAV_2901 | LuxR family transcriptional regulator  |
| 13 | NRPS  | 3930306-3937493 |         |        |                   |         |          |                                        |
| 14 | NRPS  | 3980213-3994940 |         |        |                   |         |          |                                        |
|    |       | Distance        |         |        |                   |         |          |                                        |
|    | Score | From ORF        | N       | Strand | Sequence          | Gene    | Synonym  | Protein Name                           |
|    | 76    | 11              | 3985530 | -      | CTGGAAGGTACCGTGCA | nrps1-1 | SAV_3197 | non-ribosomal peptide synthetase       |
|    | 77    | 263             | 3989602 | -      | CGGGCACGGGACTGGCC | nrps1-2 | SAV_3198 | non-ribosomal peptide synthetase       |
| 15 | NRPS  | 4494250-4540450 |         |        |                   |         |          |                                        |
|    |       | Distance        |         |        |                   |         |          |                                        |
|    | Score | From ORF        | N       | Strand | Sequence          | Gene    | Synonym  | Protein Name                           |
|    | 79    | 266             | 4496242 | -      | CTGGCGCAGATCCTGCC | pptA4   | SAV_3637 | phosphopantetheinyl transferase        |
|    | 83    | 421             | 4500418 | -      | CTGGCCCGGAACTGCT  | -       | SAV_3641 | ornithine carbamoyltransferase         |
|    | 80    | 163             | 4516448 | -      | CTGGCACGCCGAGGGCA | nrps2-2 | SAV_3643 | non-ribosomal peptide synthetase       |
|    | 76    | 214             | 4521073 | -      | GCGGCACAGCTGTTCCC | cysK2   | SAV_3648 | cysteine synthase                      |
|    | 77    | 416             | 4521275 | -      | CTGGCGCAGCTCGCC   | cysK2   | SAV_3648 | cysteine synthase                      |
|    | 76    | 211             | 4523419 | -      | CTGGCCAGGCTGCTGCG | fadE25  | SAV_3650 | acyl-CoA dehydrogenase                 |
|    | 75    | 154             | 4528046 | -      | GTGGCCAAGGAGATGCT | -       | SAV_3652 | isomerase                              |
|    | 75    | 388             | 4536085 | -      | ATGGCGCTGCGGGTGCG | -       | SAV_3661 | hypothetical protein                   |
| 16 | PKS   | 8553602-8561604 |         |        |                   |         |          |                                        |
|    |       | Distance        |         |        |                   |         |          |                                        |
|    | Score | From ORF        | N       | Strand | Sequence          | Gene    | Synonym  | Protein Name                           |
|    | 75    | 252             | 8560553 | -      | CTGGCCCGGACCGAGCT | -       | SAV_7185 | UDP-glucose:sterol glucosyltransferase |
| 17 | PKS   | 8776963-8789766 |         |        |                   |         |          |                                        |

NC\_003888.3 *Streptomyces coelicolor* A3(2), complete genome

|   |     |               |  |  |  |  |  |  |
|---|-----|---------------|--|--|--|--|--|--|
| 1 | PKS | 104989-119654 |  |  |  |  |  |  |
|---|-----|---------------|--|--|--|--|--|--|

|    |      |                 |
|----|------|-----------------|
| 2  | NRPS | 513989-526783   |
| 3  | PKS  | 1335793-1343779 |
| 4  | NRPS | 3543335-3585724 |
| 5  | PKS  | 5508078-5508078 |
| 6  | PKS  | 6432566-6465258 |
| 7  | PKS  | 6895193-6961810 |
| 8  | NRPS | 7106284-7116513 |
| 9  | PKS  | 7590412-7602007 |
| 10 | NRPS | 8506283-8523749 |

**NC\_010572.1 Streptomyces griseus subsp. griseus NBRC 13350, complete genome**

|   |          |                 |         |        |                   |       |         |                                         |
|---|----------|-----------------|---------|--------|-------------------|-------|---------|-----------------------------------------|
| 1 | PKS      | 294490-307047   |         |        |                   |       |         |                                         |
| 2 | NRPS     | 480685-538065   |         |        |                   |       |         |                                         |
|   |          | Distance        |         |        |                   |       |         |                                         |
|   | Score    | From ORF        | N       | Strand | Sequence          | Gene  | Synonym | Protein Name                            |
|   | 80       | 142             | 535949  | -      | CTGGCCCCGGTGCTGCT | -     | SGR_453 | iron ABC transporter                    |
|   | 75       | 367             | 536174  | -      | CTGGCCCGCCGCTGAA  | -     | SGR_453 | iron ABC transporter                    |
| 3 | NRPS     | 659688-691515   |         |        |                   |       |         |                                         |
|   |          | Distance        |         |        |                   |       |         |                                         |
|   | Score    | From ORF        | N       | Strand | Sequence          | Gene  | Synonym | Protein Name                            |
|   | 80       | 48              | 664691  | +      | GTGGCGTGCCTTCTGCA | -     | SGR_578 | putative SyrP-like protein              |
|   | 76       | 167             | 676251  | +      | CTGGCCCGGCTGGAGCT | -     | SGR_583 | putative NRPS                           |
|   | 82       | 298             | 685576  | -      | CTGGCCCGCCTCTGCT  | -     | SGR_588 | hypothetical protein                    |
| 4 | PKS      | 704021-717508   |         |        |                   |       |         |                                         |
|   |          | Distance        |         |        |                   |       |         |                                         |
|   | Score    | From ORF        | N       | Strand | Sequence          | Gene  | Synonym | Protein Name                            |
|   | 76       | 480             | 703541  | +      | GTGCGACGGCGTTGCC  | tebC  | SGR_604 | putative enediyne biosynthesis protein  |
|   | 76       | 474             | 704168  | +      | AGGGCACCCGAGGTGCT | unbL1 | SGR_605 | putative enediyne biosynthesis protein  |
|   | 79       | 329             | 708297  | +      | GTGGCACGCCAGTGGA  | unbU  | SGR_608 | putative enediyne biosynthesis protein  |
| 5 | NRPS     | 762595-774309   |         |        |                   |       |         |                                         |
| 6 | PKS      | 937762-968455   |         |        |                   |       |         |                                         |
|   |          | Distance        |         |        |                   |       |         |                                         |
|   | Score    | From ORF        | N       | Strand | Sequence          | Gene  | Synonym | Protein Name                            |
|   | 78       | 299             | 940053  | +      | CTGCCACAGCCGATGCA | -     | SGR_803 | putative large multi-functional protein |
|   | 81       | 130             | 956182  | -      | CTGGCACGGCAGCTCCA | -     | SGR_813 | putative FAD-dependent oxidoreductase   |
| 7 | NRPS     | 1044652-1071469 |         |        |                   |       |         |                                         |
|   |          | Distance        |         |        |                   |       |         |                                         |
|   | Score    | From ORF        | N       | Strand | Sequence          | Gene  | Synonym | Protein Name                            |
|   | 75       | 294             | 1046802 | -      | GGGGCACGCACATCGCC | -     | SGR_890 | hypothetical protein                    |
|   | 75       | 437             | 1060513 | -      | CTGGCTCACCGGATGCG | -     | SGR_896 | putative O-methyltransferase            |
| 8 | NRPS/PKS | 2924650-2941895 |         |        |                   |       |         |                                         |

| Score | Distance |         | Strand | Sequence          | Gene | Synonym  | Protein Name              |
|-------|----------|---------|--------|-------------------|------|----------|---------------------------|
|       | From ORF | N       |        |                   |      |          |                           |
| 75    | 374      | 2930023 | +      | ATGGTGCGGCAGTTGGA | -    | SGR_2485 | putative NRPS             |
| 75    | 470      | 2935806 | +      | ATGGCCATGTGCTGCC  | -    | SGR_2486 | putative aminopeptidase 2 |
| 78    | 400      | 2937233 | +      | ATGGCGCAGCGGTGCA  | -    | SGR_2487 | putative thioesterase     |

**9** NRPS 3048501-3074603

**10** NRPS 3762124-3830096

**11** PKS 7102079-7171428

| Score | Distance |         | Strand | Sequence         | Gene   | Synonym  | Protein Name        |
|-------|----------|---------|--------|------------------|--------|----------|---------------------|
|       | From ORF | N       |        |                  |        |          |                     |
| 76    | 362      | 7161653 | +      | TCGGCAGCTCGGTGCC | pks1-7 | SGR_6083 | putative type-I PKS |

**12** PKS 7286041-7354154

**13** PKS 7551740-7619551

| Score | Distance |         | Strand | Sequence          | Gene   | Synonym  | Protein Name         |
|-------|----------|---------|--------|-------------------|--------|----------|----------------------|
|       | From ORF | N       |        |                   |        |          |                      |
| 83    | 426      | 7551314 | +      | CTGGCAGGGCAGTTGGA | -      | SGR_6359 | hypothetical protein |
| 78    | 256      | 7570469 | -      | CTGGGACTGTCTCGCT  | -      | SGR_6360 | hypothetical protein |
| 75    | 422      | 7574873 | -      | GTGGCCGACGTAGTGCA | -      | SGR_6365 | hypothetical protein |
| 76    | 266      | 7596949 | -      | CTGGCCGGGCACCTGCG | pks3-3 | SGR_6371 | putative type-I PKS  |
| 81    | 244      | 7619795 | -      | GTGGCCAGCGGTGCA   | pks3-1 | SGR_6373 | putative type-I PKS  |

**14** NRPS 8011976-8029693

| Score | Distance |         | Strand | Sequence         | Gene | Synonym  | Protein Name                                                             |
|-------|----------|---------|--------|------------------|------|----------|--------------------------------------------------------------------------|
|       | From ORF | N       |        |                  |      |          |                                                                          |
| 81    | 164      | 8012818 | +      | GCGGCAGATCCGTGCA | -    | SGR_6714 | putative ABC-type Fe3+-siderophore transporter substrate-binding protein |
| 85    | 326      | 8015602 | +      | CTGGCCGGCTGGTGCT | -    | SGR_6716 | putative NRPS                                                            |
| 77    | 424      | 8030117 | -      | CTGGCACATCGGTGCT | -    | SGR_6718 | putative esterase                                                        |

**15** NRPS 8049140-8065069

**16** PKS 8100042-8154770

| Score | Distance |         | Strand | Sequence          | Gene   | Synonym  | Protein Name                            |
|-------|----------|---------|--------|-------------------|--------|----------|-----------------------------------------|
|       | From ORF | N       |        |                   |        |          |                                         |
| 78    | 30       | 8100012 | +      | CGGGCAGAGTCTTGCG  | pks4-1 | SGR_6776 | putative NRPS-type-I PKS fusion protein |
| 77    | 383      | 8110593 | +      | TTCGCACGGACGGTGCG | pks4-2 | SGR_6777 | putative type-I PKS                     |
| 75    | 269      | 8124572 | +      | TTCGGACGCATCGTGCT | -      | SGR_6780 | putative malonyl-CoA:ACP transacylase   |

**NC\_003228.3 Bacteroides fragilis NCTC 9343, complete genome**

**1** NRPS 3294535-3306572

**2** NRPS 3635663-3639879

| Score | Distance |         | Strand | Sequence          | Gene | Synonym | Protein Name         |
|-------|----------|---------|--------|-------------------|------|---------|----------------------|
|       | From ORF | N       |        |                   |      |         |                      |
| 75    | 357      | 3638482 | +      | GCGGCCGACAGCTTGCT | -    | BF3118  | hypothetical protein |

**NC\_005125.1 Gloeobacter violaceus PCC 7421, complete genome**

**1** PKS 2057662-2100787

| Score | Distance |         | Strand | Sequence         | Gene | Synonym | Protein Name                                  |
|-------|----------|---------|--------|------------------|------|---------|-----------------------------------------------|
|       | From ORF | N       |        |                  |      |         |                                               |
| 76    | 304      | 2064191 | -      | ATGGTCCGCATCTTCT | -    | gll1939 | cyclopropane-fatty-acyl-phospholipid synthase |

|    |     |         |   |                    |   |         |                                               |
|----|-----|---------|---|--------------------|---|---------|-----------------------------------------------|
| 83 | 457 | 2064344 | - | CTGGCCCCGAGATCTGCT | - | gll1939 | cyclopropane-fatty-acyl-phospholipid synthase |
| 77 | 280 | 2065156 | - | ATGGCCCAAGTTGTGGCC | - | gll1940 | fatty acid desaturase                         |
| 77 | 423 | 2072927 | - | GCGGCCCTGGGGTTGCT  | - | gll1946 | fatty acid desaturase                         |
| 81 | 329 | 2073836 | - | GTGGGGCGGCTTTTGCC  | - | gll1947 | fatty acid desaturase                         |
| 75 | 166 | 2078085 | - | CCGGCAGCACTCTGCA   | - | gll1950 | long-chain fatty-acid-CoA ligase              |
| 76 | 219 | 2078138 | - | ATGGCTTCGCACTCGCT  | - | gll1950 | long-chain fatty-acid-CoA ligase              |
| 77 | 466 | 2078385 | - | GGGGCGCACCCCTTGCG  | - | gll1950 | long-chain fatty-acid-CoA ligase              |
| 81 | 411 | 2079094 | - | CTGGAGCGCTGTTTGCA  | - | gll1951 | phosphopantetheinyltransferase family protein |
| 76 | 461 | 2088597 | - | GTGGCTGGACAGTTGAT  | - | gll1954 | polyketide synthase                           |
| 76 | 146 | 2088597 | - | GTGGCTGGACAGTTGAT  | - | gll1955 | polyketide synthase                           |
| 75 | 317 | 2088768 | - | ATGGCCCTGATCTTTCG  | - | gll1955 | polyketide synthase                           |
| 75 | 277 | 2094691 | - | CTGGACCAGTTGCTGCA  | - | gll1957 | glycolipid synthase                           |

**2** PKS 2999221-3029646

| Score | Distance From ORF | N       | Strand | Sequence          | Gene | Synonym | Protein Name                 |
|-------|-------------------|---------|--------|-------------------|------|---------|------------------------------|
| 77    | 396               | 2998825 | +      | CTGGCACCAGAAACGCT | -    | glr2821 | WD repeat-containing protein |
| 81    | 288               | 3009343 | -      | CTGGCGGGCCTTTGCG  | -    | gll2826 | hypothetical protein         |
| 77    | 307               | 3010641 | -      | ACGGGACATGATTGCT  | -    | gll2827 | hypothetical protein         |
| 80    | 157               | 3014822 | -      | CAGGCGCTGATCTTGCT | -    | gll2829 | polyketide synthase          |
| 79    | 450               | 3023483 | -      | GTGGCACAGACCGTCCT | -    | gll2836 | alcohol dehydrogenase        |
| 79    | 174               | 3023483 | -      | GTGGCACAGACCGTCCT | -    | gsl2837 | hypothetical protein         |

**3** PKS 3033832-3050434

| Score | Distance From ORF | N       | Strand | Sequence          | Gene | Synonym | Protein Name   |
|-------|-------------------|---------|--------|-------------------|------|---------|----------------|
| 75    | 221               | 3040466 | +      | CTGGCGCAGTGTGAG   | -    | glr2850 | thioesterase   |
| 79    | 41                | 3040646 | +      | CTGGCAACTCGGTGCA  | -    | glr2850 | thioesterase   |
| 78    | 393               | 3048049 | +      | GTGGCCCGTCCGATGCC | -    | glr2859 | oxidoreductase |

**4** PKS 4421532-4440489

| Score | Distance From ORF | N       | Strand | Sequence          | Gene | Synonym | Protein Name         |
|-------|-------------------|---------|--------|-------------------|------|---------|----------------------|
| 75    | 215               | 4422391 | -      | CTGGAAAGTCCATCGCT | -    | gll4219 | hypothetical protein |
| 83    | 331               | 4422933 | -      | CTGGCCGAGGATTGCT  | -    | gll4220 | hypothetical protein |
| 75    | 154               | 4431563 | -      | CTGGTAGGCCCATGCG  | -    | gll4225 | glycolipid synthase  |

**NC\_010296.1 Microcystis aeruginosa NIES-843, complete genome**

**1** NRPS/PKS 2507861-2539146

| Score | Distance From ORF | N       | Strand | Sequence          | Gene | Synonym   | Protein Name                       |
|-------|-------------------|---------|--------|-------------------|------|-----------|------------------------------------|
| 77    | 38                | 2518358 | +      | TGGGCGCAAGCCTTGCG | -    | MAE_27820 | amino acid adenylation short-chain |
| 78    | 118               | 2526583 | +      | TGGGCGCGAGCATTGCG | -    | MAE_27860 | dehydrogenase/reductase            |
| 79    | 235               | 2537743 | +      | GTGGCATCGGTTGTGCG | -    | MAE_27910 | hypothetical protein               |

**2** NRPS/PKS 3486436-3541027

| Score | Distance From ORF | N       | Strand | Sequence          | Gene | Synonym   | Protein Name |
|-------|-------------------|---------|--------|-------------------|------|-----------|--------------|
| 79    | 340               | 3528001 | +      | GTGGCAATTGCTCTGCA | mcyF | MAE_38620 | McyF protein |
| 79    | 114               | 3540068 | +      | ATGGCAATATTCTGCA  | mcyJ | MAE_38660 | McyJ protein |

**3** NRPS 5194435-5220124

| Score | Distance From ORF | N       | Strand | Sequence          | Gene | Synonym   | Protein Name         |
|-------|-------------------|---------|--------|-------------------|------|-----------|----------------------|
| 75    | 130               | 5208380 | -      | TTGGCATGGTATTCTCA | -    | MAE_56550 | hypothetical protein |

|    |     |         |   |                   |   |           |                                                  |
|----|-----|---------|---|-------------------|---|-----------|--------------------------------------------------|
| 80 | 148 | 5209406 | - | TTGGCTCGACCGTTTCT | - | MAE_56560 | bacilysin biosynthesis protein BacA-like protein |
| 80 | 198 | 5209456 | - | ATGGCTTAGACCTTGCC | - | MAE_56560 | bacilysin biosynthesis protein BacA-like protein |

4 843, complete genome 5519975-5552181 Type: NRPS

**NC\_010628.1 Nostoc punctiforme PCC 73102, complete genome**

| 1     | PKS               | 56243-74142     |        |                   |      |            |                                                                       |  |
|-------|-------------------|-----------------|--------|-------------------|------|------------|-----------------------------------------------------------------------|--|
| Score | Distance From ORF | N               | Strand | Sequence          | Gene | Synonym    | Protein Name                                                          |  |
| 81    | 379               | 58235           | -      | GTGGCAATATAATTGCC | -    | Npun_R0038 | short-chain dehydrogenase/reductase SDR polyketide synthase thioester |  |
| 79    | 405               | 60343           | -      | TTCGCAAAACTATTGCT | -    | Npun_R0039 | reductase subunit HglB                                                |  |
| 76    | 291               | 68964           | -      | ATGGCCCAAAGTTTCA  | -    | Npun_R0042 | KR                                                                    |  |
| 2     | PKS               | 1549256-1571247 |        |                   |      |            |                                                                       |  |
| 3     | PKS               | 2521301-2548634 |        |                   |      |            |                                                                       |  |
| 4     | NRPS/PKS          | 2648282-2708401 |        |                   |      |            |                                                                       |  |
| Score | Distance From ORF | N               | Strand | Sequence          | Gene | Synonym    | Protein Name                                                          |  |
| 75    | 183               | 2660116         | -      | TTGTCATAGACATTGCC | -    | Npun_R2175 | KR                                                                    |  |
| 79    | 484               | 2664987         | -      | ATGGCAGGTATAATGCC | -    | Npun_R2178 | WD-40 repeat-containing protein                                       |  |
| 76    | 206               | 2704134         | +      | GTGATACAGTAATTGCA | -    | Npun_F2186 | alcohol dehydrogenase                                                 |  |
| 81    | 362               | 2705124         | +      | CAGGCATTCTATTGCT  | -    | Npun_F2187 | pyrroline-5-carboxylate reductase                                     |  |
| 5     | NRPS              | 3054973-3081156 |        |                   |      |            |                                                                       |  |
| Score | Distance From ORF | N               | Strand | Sequence          | Gene | Synonym    | Protein Name                                                          |  |
| 76    | 50                | 3055694         | +      | TGGGCAAGGATATAGCA | -    | Npun_F2460 | amino acid adenylation domain-containing protein                      |  |
| 76    | 93                | 3065615         | +      | GTGACTCAAGAGTTGCT | -    | Npun_F2462 | amino acid adenylation domain-containing protein                      |  |
| 6     | NRPS/PKS          | 3722118-3780010 |        |                   |      |            |                                                                       |  |
| 7     | NRPS/PKS          | 3899401-3958883 |        |                   |      |            |                                                                       |  |
| Score | Distance From ORF | N               | Strand | Sequence          | Gene | Synonym    | Protein Name                                                          |  |
| 75    | 191               | 3899210         | +      | TTCACACGTATGTTGCT | -    | Npun_F3155 | hypothetical protein                                                  |  |
| 86    | 415               | 3925855         | +      | ATGGCGTGAATTTTGCT | -    | Npun_F3168 | hypothetical protein                                                  |  |
| 76    | 296               | 3950844         | +      | GTGGCTAGGGTCTGCG  | -    | Npun_F3173 | amino acid adenylation domain-containing protein                      |  |
| 75    | 148               | 3950992         | +      | AAGGCCCTAGTATTGCC | -    | Npun_F3173 | amino acid adenylation domain-containing protein                      |  |
| 75    | 54                | 3955358         | +      | TAGGAAGATAATTGCT  | -    | Npun_F3174 | isoprenylcysteine carboxyl methyltransferase                          |  |
| 8     | PKS               | 4180429-4210477 |        |                   |      |            |                                                                       |  |
| Score | Distance From ORF | N               | Strand | Sequence          | Gene | Synonym    | Protein Name                                                          |  |
| 75    | 482               | 4181756         | -      | CTGGAACATTTATTGCT | -    | Npun_R3355 | thioesterase                                                          |  |
| 75    | 474               | 4185955         | +      | TTGTCAGGAGGTTGCC  | -    | Npun_F3359 | beta-ketoacyl synthase                                                |  |
| 76    | 364               | 4186065         | +      | CTGGCTAGAGAAATGCT | -    | Npun_F3359 | beta-ketoacyl synthase                                                |  |

|           |          |                   |                 |        |                   |      |            |                                                  |
|-----------|----------|-------------------|-----------------|--------|-------------------|------|------------|--------------------------------------------------|
|           | 83       | 221               | 4201954         | +      | ATGGCAGTGATATTGCC | -    | Npun_F3363 | short-chain dehydrogenase/reductase SDR, HetN    |
| <b>9</b>  | NRPS/PKS |                   | 4256267-4330313 |        |                   |      |            |                                                  |
|           | Score    | Distance From ORF | N               | Strand | Sequence          | Gene | Synonym    | Protein Name                                     |
|           | 81       | 468               | 4259675         | -      | ATGGCAAGAGTTTTGTA | -    | Npun_R3419 | thioesterase                                     |
|           | 81       | 165               | 4259675         | -      | ATGGCAAGAGTTTTGTA | -    | Npun_R3420 | MbtH domain-containing protein                   |
|           | 76       | 491               | 4260403         | -      | ATTGCACGAGGCTTCT  | -    | Npun_R3421 | hypothetical protein                             |
|           | 77       | 499               | 4280094         | -      | ACGGCCCGACTGTAGCT | -    | Npun_R3429 | condensation domain-containing protein           |
|           | 76       | 482               | 4286311         | -      | TTGGATCGCGCATCGCT | -    | Npun_R3430 | beta-ketoacyl synthase                           |
|           | 75       | 239               | 4307280         | -      | ATGGCTCTCTTATTGAA | -    | Npun_R3436 | amino acid adenylation domain-containing protein |
|           | 78       | 331               | 4307372         | -      | TTGGCATCCAGCTTGTT | -    | Npun_R3436 | amino acid adenylation domain-containing protein |
|           | 81       | 358               | 4321256         | -      | ATGGCAGCACTTGTGCA | -    | Npun_R3448 | taurine catabolism dioxygenase TauD/TfdA         |
| <b>10</b> | NRPS/PKS |                   | 8150738-8167006 |        |                   |      |            |                                                  |

#### NC\_008536.1 *Solibacter usitatus* Ellin6076, complete genome

|          |       |                   |                 |        |                   |      |           |                                    |
|----------|-------|-------------------|-----------------|--------|-------------------|------|-----------|------------------------------------|
| <b>1</b> | PKS   |                   | 2480784-2494608 |        |                   |      |           |                                    |
|          | Score | Distance From ORF | N               | Strand | Sequence          | Gene | Synonym   | Protein Name                       |
|          | 80    | 22                | 2489341         | +      | CTGGCCGGGAGATTGCG | -    | Acid_1973 | beta-ketoacyl synthase             |
|          | 77    | 463               | 2493837         | +      | ACGGCAGACCCATTGCC | -    | Acid_1974 | putative acyl carrier protein      |
| <b>2</b> | PKS   |                   | 3884932-3895290 |        |                   |      |           |                                    |
|          | Score | Distance From ORF | N               | Strand | Sequence          | Gene | Synonym   | Protein Name                       |
|          | 75    | 213               | 3885870         | -      | GTGGATCGAGTTTCGCT | -    | Acid_3076 | 4'-phosphopantetheinyl transferase |
|          | 78    | 300               | 3885957         | -      | ATGGCACCGCGCTGAT  | -    | Acid_3076 | 4'-phosphopantetheinyl transferase |
|          | 77    | 50                | 3893616         | -      | CGGGCAGCCGCTTGAG  | -    | Acid_3077 | beta-ketoacyl synthase             |

#### NC\_009674.1 *Bacillus cereus* subsp. *cytotoxis* NVH 391-98, complete genome

|          |       |                   |                 |        |                   |      |             |                                                  |
|----------|-------|-------------------|-----------------|--------|-------------------|------|-------------|--------------------------------------------------|
| <b>1</b> | NRPS  |                   | 417602-429629   |        |                   |      |             |                                                  |
|          | Score | Distance From ORF | N               | Strand | Sequence          | Gene | Synonym     | Protein Name                                     |
|          | 80    | 491               | 422474          | +      | CTGGTAGAGGATTTGCA | -    | Bcer98_0368 | amino acid adenylation domain-containing protein |
| <b>2</b> | NRPS  |                   | 1197549-1205485 |        |                   |      |             |                                                  |
|          | Score | Distance From ORF | N               | Strand | Sequence          | Gene | Synonym     | Protein Name                                     |
|          | 77    | 484               | 1198103         | +      | ACGTCACGAGGTTTGCA | -    | Bcer98_1088 | 2-nitropropane dioxygenase NPD                   |
| <b>3</b> | NRPS  |                   | 1853248-1878954 |        |                   |      |             |                                                  |
|          | Score | Distance From ORF | N               | Strand | Sequence          | Gene | Synonym     | Protein Name                                     |
|          | 76    | 310               | 1855588         | +      | TTGGAGCGTCTTTGGCT | -    | Bcer98_1744 | AMP-dependent synthetase and ligase              |
|          | 80    | 293               | 1856961         | +      | TAGGCGCTGGTGTGCT  | -    | Bcer98_1745 | hypothetical protein                             |
| <b>4</b> | PKS   |                   | 3245067-3256221 |        |                   |      |             |                                                  |

| 5     | PKS               | 1781906-1859783 |        |                   |      |          |                                             |  |
|-------|-------------------|-----------------|--------|-------------------|------|----------|---------------------------------------------|--|
| Score | Distance From ORF | N               | Strand | Sequence          | Gene | Synonym  | Protein Name                                |  |
| 77    | 130               | 1785974         | +      | CCGGCACCTTAGCTGCT | pksE | BSU17120 | enzyme involved in polyketide synthesis     |  |
| 81    | 446               | 1791566         | +      | CTGCCACAGATATTGCC | pksI | BSU17170 | polyketide biosynthesis enoyl-CoA hydratase |  |

| 6     | NRPS              | 1949682-2002351 |        |                   |      |          |                                              |  |
|-------|-------------------|-----------------|--------|-------------------|------|----------|----------------------------------------------|--|
| Score | Distance From ORF | N               | Strand | Sequence          | Gene | Synonym  | Protein Name                                 |  |
| 81    | 138               | 1956312         | -      | GTGGAACGGATGCTGCG | yngI | BSU18250 | AMP-binding domain protein                   |  |
| 82    | 303               | 1956477         | -      | CTGGCACGGCAAATGGT | yngI | BSU18250 | AMP-binding domain protein                   |  |
| 79    | 340               | 1957700         | -      | CGGGCACTGCTCTTGTT | yngJ | BSU18260 | acyl-CoA dehydrogenase, short-chain specific |  |
| 76    | 263               | 1960350         | -      | ATGGAAGCGCCTGCG   | yngL | BSU18290 | putative integral inner membrane protein     |  |
| 77    | 161               | 1975017         | -      | ATTGAACACTTTTGCT  | ppsD | BSU18310 | plipastatin synthetase                       |  |

| 7     | NRPS              | 3280519-3297919 |        |                   |      |          |                                  |  |
|-------|-------------------|-----------------|--------|-------------------|------|----------|----------------------------------|--|
| Score | Distance From ORF | N               | Strand | Sequence          | Gene | Synonym  | Protein Name                     |  |
| 75    | 391               | 3290651         | -      | GTGGCACCTGTCCAGCG | dhbE | BSU31980 | 2,3-dihydroxybenzoate-AMP ligase |  |
| 82    | 299               | 3291784         | -      | TTGGCCTTGAGCTTGCA | dhbC | BSU31990 | isochorismate synthase DhbC      |  |
| 78    | 267               | 3296537         | -      | CAGGCACAGCGACTGCC | yuiF | BSU32040 | amino acid transporter           |  |
| 80    | 328               | 3296598         | -      | ATGGCAGGAACGTTTCT | yuiF | BSU32040 | amino acid transporter           |  |

| 8     | NRPS              | 3952275-3958482 |        |                   |      |          |                                            |  |
|-------|-------------------|-----------------|--------|-------------------|------|----------|--------------------------------------------|--|
| Score | Distance From ORF | N               | Strand | Sequence          | Gene | Synonym  | Protein Name                               |  |
| 78    | 347               | 3957044         | +      | ATGGCACCGCCTATGGT | ywaA | BSU38550 | branched-chain amino acid aminotransferase |  |

**NC\_003030.1 Clostridium acetobutylicum ATCC 824, complete genome**

| 1 | PKS | 3529432-3534819 |  |  |  |  |  |  |
|---|-----|-----------------|--|--|--|--|--|--|
|---|-----|-----------------|--|--|--|--|--|--|

**NC\_009706.1 Clostridium kluveri DSM 555, complete genome**

| 1     | NRPS              | 1554646-1602560 |        |                   |      |          |                                            |  |
|-------|-------------------|-----------------|--------|-------------------|------|----------|--------------------------------------------|--|
| Score | Distance From ORF | N               | Strand | Sequence          | Gene | Synonym  | Protein Name                               |  |
| 75    | 321               | 1564208         | +      | CTCGAATGGATATTGCT | -    | CKL_1507 | NRPS cyclization domain containing protein |  |
| 77    | 233               | 1578681         | +      | GAGGCATAGAACATGCA | -    | CKL_1515 | hypothetical protein                       |  |

| 2 | NRPS/PKS | 1818097-1833491 |  |  |  |  |  |  |
|---|----------|-----------------|--|--|--|--|--|--|
|---|----------|-----------------|--|--|--|--|--|--|

| 3     | NRPS/PKS          | 2414655-2426709 |        |                   |      |          |                                 |  |
|-------|-------------------|-----------------|--------|-------------------|------|----------|---------------------------------|--|
| Score | Distance From ORF | N               | Strand | Sequence          | Gene | Synonym  | Protein Name                    |  |
| 76    | 361               | 2419626         | -      | TTGATACAGTTTTTGCA | -    | CKL_2354 | nonribosomal peptide synthetase |  |

**NC\_008497.1 Lactobacillus brevis ATCC 367, complete genome**

| 1     | NRPS              | 1293616-1300116 |        |                   |      |           |                           |  |
|-------|-------------------|-----------------|--------|-------------------|------|-----------|---------------------------|--|
| Score | Distance From ORF | N               | Strand | Sequence          | Gene | Synonym   | Protein Name              |  |
| 75    | 122               | 1297040         | -      | GTGCAACTGTTGTTGCA | -    | LVIS_1323 | D-alanyl transfer protein |  |

|    |     |         |   |                   |   |           |                                                     |
|----|-----|---------|---|-------------------|---|-----------|-----------------------------------------------------|
| 81 | 491 | 1300607 | - | GGGGCACCACGGTTGCG | - | LVIS_1327 | D-Ala-teichoic acid biosynthesis protein (putative) |
|----|-----|---------|---|-------------------|---|-----------|-----------------------------------------------------|

**NC\_002973.6 *Listeria monocytogenes* str. 4b F2365, complete genome**

|          |      |                 |
|----------|------|-----------------|
| <b>1</b> | NRPS | 1002948-1007380 |
|----------|------|-----------------|

**NC\_002952.2 *Staphylococcus aureus* subsp. *aureus* MRSA252, complete genome**

|          |       |                   |        |        |                  |      |         |                                           |
|----------|-------|-------------------|--------|--------|------------------|------|---------|-------------------------------------------|
| <b>1</b> | NRPS  | 198393-206225     |        |        |                  |      |         |                                           |
|          | Score | Distance From ORF | N      | Strand | Sequence         | Gene | Synonym | Protein Name                              |
|          | 81    | 487               | 197906 | +      | CTAGCATGCTTGTGCT | -    | SAR0180 | putative non-ribosomal peptide synthetase |

**NC\_003063.2 *Agrobacterium tumefaciens* str. C58 chromosome linear, complete sequence**

|          |          |                   |        |        |                   |      |         |                                                                    |
|----------|----------|-------------------|--------|--------|-------------------|------|---------|--------------------------------------------------------------------|
| <b>1</b> | NRPS     | 74687-80557       |        |        |                   |      |         |                                                                    |
|          | Score    | Distance From ORF | N      | Strand | Sequence          | Gene | Synonym | Protein Name                                                       |
|          | 78       | 121               | 79699  | -      | ATGGCTGCTCGGTTGCT | -    | Atu3073 | aspartate racemase                                                 |
|          | 83       | 322               | 80879  | -      | CCGGCAGCGGCTCGCT  | -    | Atu3074 | short chain dehydrogenase                                          |
| <b>2</b> | NRPS/PKS | 716058-769035     |        |        |                   |      |         |                                                                    |
|          | Score    | Distance From ORF | N      | Strand | Sequence          | Gene | Synonym | Protein Name                                                       |
|          | 78       | 463               | 729910 | -      | CTGGTCCGGATTCGCT  | -    | Atu3673 | siderophore biosynthesis protein                                   |
|          | 78       | 187               | 729910 | -      | CTGGTCCGGATTCGCT  | -    | Atu3674 | hypothetical protein                                               |
|          | 85       | 425               | 734796 | +      | ATGGCACGCTACTGGCG | -    | Atu3677 | polyketide synthase, siderophore biosynthesis protein              |
|          | 75       | 293               | 734928 | +      | GCGGCGGTTTCTCGCT  | -    | Atu3677 | polyketide synthase, siderophore biosynthesis protein              |
|          | 75       | 28                | 737448 | +      | ATGCAAGGCTTCTTGCA | -    | Atu3680 | putative siderophore biosynthesis protein                          |
|          | 80       | 62                | 742445 | +      | ATGGCAGCGCTTTGAT  | -    | Atu3682 | non-ribosomal peptide synthetase, siderophore biosynthesis protein |
|          | 86       | 328               | 765024 | +      | TTGGCACGGATGTCGCC | fecD | Atu3690 | ABC transporter, membrane spanning protein (iron (III) dicitrate)  |
|          | 79       | 247               | 765105 | +      | CCGGCAGCGCGTTGCA  | fecD | Atu3690 | ABC transporter, membrane spanning protein (iron (III) dicitrate)  |
|          | 75       | 470               | 767004 | +      | CTGGCGCCCAGGTGCC  | -    | Atu3692 | sigma factor                                                       |

**NC\_012988.1 *Methylobacterium extorquens* DM4, complete genome**

|          |     |                 |
|----------|-----|-----------------|
| <b>1</b> | PKS | 2613383-2622159 |
|----------|-----|-----------------|

**NC\_012988.1 *Methylobacterium extorquens* DM4, complete genome**

|          |      |                 |
|----------|------|-----------------|
| <b>1</b> | NRPS | 4859328-4866323 |
|----------|------|-----------------|

rquens DM4, complete genome 5649466-5678659 Type: NRPS

|  |       |                   |   |        |          |      |         |              |
|--|-------|-------------------|---|--------|----------|------|---------|--------------|
|  | Score | Distance From ORF | N | Strand | Sequence | Gene | Synonym | Protein Name |
|--|-------|-------------------|---|--------|----------|------|---------|--------------|



|    |     |         |   |                   |      |           |                                                                     |
|----|-----|---------|---|-------------------|------|-----------|---------------------------------------------------------------------|
| 86 | 134 | 5649332 | + | CAGGCACAGGCTTTGCT | -    | METDI5670 | putative UDP-N-acetyl-D-mannosaminuronic acid dehydrogenase         |
| 77 | 53  | 5653547 | + | ATGGCGCCCGTCTTCT  | -    | METDI5674 | putative glycosyl transferase                                       |
| 75 | 105 | 5662917 | - | CCGGCAACCACCTTGCC | -    | METDI5678 | hypothetical protein                                                |
| 75 | 46  | 5667529 | - | ATGGCAGGTCCGCCGCT | -    | METDI5683 | hypothetical protein                                                |
| 75 | 148 | 5675379 | - | CTGGCACCGCGCTTCGA | murE | METDI5688 | UDP-N-acetylmuramoylalanyl-D-glutamate--2, 6-diaminopimelate ligase |
| 75 | 355 | 5677962 | - | TTGGTGCGCGGCTGCA  | -    | METDI5690 | hypothetical protein                                                |

**NC\_003296.1 Ralstonia solanacearum GMI1000 plasmid pGMI1000MP, complete sequence**

| 1 | NRPS/PKS | 782247-820777   |         |        |                    |          |         |                                                                                  |
|---|----------|-----------------|---------|--------|--------------------|----------|---------|----------------------------------------------------------------------------------|
|   |          | Distance        |         |        |                    |          |         |                                                                                  |
|   | Score    | From ORF        | N       | Strand | Sequence           | Gene     | Synonym | Protein Name                                                                     |
|   | 76       | 194             | 802722  | +      | CTGGCCGAACCTCTGGCA | RSp0642  | RS05859 | peptide synthetase protein                                                       |
| 2 | NRPS     | 1782597-1797233 |         |        |                    |          |         |                                                                                  |
|   |          | Distance        |         |        |                    |          |         |                                                                                  |
|   | Score    | From ORF        | N       | Strand | Sequence           | Gene     | Synonym | Protein Name                                                                     |
|   | 76       | 13              | 1787443 | +      | CTCCCACCGCTTTTGCA  | RSp1421  | RS03121 | hypothetical protein                                                             |
| 3 | NRPS/PKS | 1945814-1979076 |         |        |                    |          |         |                                                                                  |
|   |          | Distance        |         |        |                    |          |         |                                                                                  |
|   | Score    | From ORF        | N       | Strand | Sequence           | Gene     | Synonym | Protein Name                                                                     |
|   | 79       | 452             | 1949544 | -      | GTCGCACGCGATCTGCA  | tISRso15 | RSp1547 | ISRSO15-transposase protein                                                      |
|   | 83       | 50              | 1950406 | -      | GTGGCAGTTCATGCG    | RSp1549  | RS02105 | hypothetical protein                                                             |
|   | 82       | 103             | 1951581 | -      | CCGGCATTGCTTTTGCA  | RSp1551  | RS02107 | hypothetical protein                                                             |
|   | 80       | 248             | 1951726 | -      | GTGGCGCTGCTGGTGCA  | RSp1551  | RS02107 | hypothetical protein                                                             |
|   | 75       | 279             | 1957715 | +      | GTGGGATGGGATATGCC  | hexR     | RSp1556 | putative transcription regulation repressor HEXR transcription regulator protein |
|   | 75       | 60              | 1957934 | +      | GCGGCCCCGCGCTTGCC  | hexR     | RSp1556 | putative transcription regulation repressor HEXR transcription regulator protein |
|   | 77       | 289             | 1960873 | -      | GCGGCACTGGGCTGCA   | pgl      | RSp1558 | 6-phosphogluconolactonase oxidoreductase protein                                 |
|   | 77       | 106             | 1962311 | +      | GAGGCACGCAATTCGCG  | edd      | RSp1560 | phosphogluconate dehydratase                                                     |
|   | 78       | 135             | 1964859 | -      | CGGGCATCGTTGTTGCG  | RSp1561  | RS02117 | hypothetical protein                                                             |
|   | 80       | 247             | 1964633 | +      | ATGGCGCGGATGGTGCC  | RSp1562  | RS02118 | hypothetical protein                                                             |
|   | 77       | 139             | 1965305 | +      | TGCGCATGGATTTTGCA  | RSp1563  | RS02119 | hypothetical protein                                                             |
|   | 75       | 312             | 1974525 | -      | CTGGAATGGCGTTAGCG  | RSp1571  | RS02127 | transcriptional regulator transcription regulator protein                        |

**NC\_008095.1 Myxococcus xanthus DK 1622, complete genome**

| 1 | NRPS  | 1488859-1520119 |         |        |                      |      |           |                                                                |
|---|-------|-----------------|---------|--------|----------------------|------|-----------|----------------------------------------------------------------|
|   |       | Distance        |         |        |                      |      |           |                                                                |
|   | Score | From ORF        | N       | Strand | Sequence             | Gene | Synonym   | Protein Name                                                   |
|   | 82    | 476             | 1490324 | +      | GTGGCGCGGCCCTTGAA    | -    | MXAN_1276 | glutamate-cysteine ligase family 2 protein                     |
|   | 77    | 461             | 1497379 | -      | TCTGGAACGCTGCAGAGGGG | -    | MXAN_1281 | hypothetical protein                                           |
|   | 75    | 1               | 1500305 | +      | AGGGCAAGGCATTCCA     | -    | MXAN_1284 | 2-isopropylmalate synthase/homocitrate synthase family protein |

|    |     |         |   |                       |      |           |                                              |
|----|-----|---------|---|-----------------------|------|-----------|----------------------------------------------|
| 75 | 159 | 1503794 | + | TTGGACCGCTCGTGCG      | abcA | MXAN_1286 | ABC transporter permease/ATP-binding protein |
| 75 | 63  | 1503890 | + | TTGGCGCGGAAGGCGCA     | abcA | MXAN_1286 | ABC transporter permease/ATP-binding protein |
| 76 | 304 | 1505775 | + | CATTGCCCGCCCTGCTGCTG  | -    | MXAN_1287 | hypothetical protein                         |
| 78 | 233 | 1505846 | + | GAGGCCAACTGTTGCG      | -    | MXAN_1287 | hypothetical protein                         |
| 77 | 252 | 1517769 | - | CCCTGGCACGTGACGTGTCAA | -    | MXAN_1291 | non-ribosomal peptide synthetase             |
| 79 | 252 | 1517769 | - | CCCTGGCACGTGACGTGTCA  | -    | MXAN_1291 | non-ribosomal peptide synthetase             |
| 80 | 250 | 1517767 | - | CTGGCACGTGACGTGTT     | -    | MXAN_1291 | non-ribosomal peptide synthetase             |
| 76 | 460 | 1517977 | - | GTGGTGCGGCGGATGCA     | -    | MXAN_1291 | non-ribosomal peptide synthetase             |
| 76 | 455 | 1518967 | - | GCTGGCGCGGAGGAAGTGAAG | -    | MXAN_1292 | hypothetical protein                         |
| 75 | 300 | 1520419 | - | ACCGGTACACAGTTGGTGGCG | hemG | MXAN_1293 | protoporphyrinogen oxidase                   |
| 76 | 336 | 1520455 | - | GGAGACCGGCGTTGTGATG   | hemG | MXAN_1293 | protoporphyrinogen oxidase                   |

**2 NRPS 1832662-1910318**

| Score | Distance From ORF | N       | Strand | Sequence               | Gene | Synonym   | Protein Name                                          |
|-------|-------------------|---------|--------|------------------------|------|-----------|-------------------------------------------------------|
| 75    | 298               | 1834249 | -      | GTGGCACGTCGCTGGTG      | -    | MXAN_1560 | class I aminotransferase                              |
| 79    | 84                | 1836766 | -      | TCTGGCACGGTGACTGCTAAGC | ahpC | MXAN_1564 | alkyl hydroperoxide reductase C                       |
| 89    | 85                | 1836767 | -      | TTCTGGCACGGTGACTGCTAAG | ahpC | MXAN_1564 | alkyl hydroperoxide reductase C                       |
| 89    | 83                | 1836765 | -      | CTGGCACGGTGACTGCT      | ahpC | MXAN_1564 | alkyl hydroperoxide reductase C                       |
| 88    | 85                | 1836767 | -      | TTCTGGCACGGTGACTGCTAAG | ahpC | MXAN_1564 | alkyl hydroperoxide reductase C                       |
| 77    | 420               | 1841516 | -      | CGCTGGCGCGGTTGCTGCGCAT | -    | MXAN_1567 | urea amidolyase-like protein                          |
| 79    | 420               | 1841516 | -      | CGCTGGCGCGGTTGCTGCGCA  | -    | MXAN_1567 | urea amidolyase-like protein                          |
| 80    | 418               | 1841514 | -      | CTGGCGCGGTTGCTGCG      | -    | MXAN_1567 | urea amidolyase-like protein                          |
| 76    | 61                | 1842452 | -      | GGCTGGCACGCCAGCGTCTCCG | -    | MXAN_1568 | LamB/YcsF family/allophanate hydrolase family protein |
| 78    | 61                | 1842452 | -      | GGCTGGCACGCCAGCGTCTCC  | -    | MXAN_1568 | LamB/YcsF family/allophanate hydrolase family protein |
| 75    | 461               | 1842852 | -      | AGCTGCCACGCGCTGGCGCG   | -    | MXAN_1568 | LamB/YcsF family/allophanate hydrolase family protein |
| 76    | 293               | 1844083 | +      | ATGACTCGACGCTTGCG      | -    | MXAN_1570 | class V aminotransferase                              |
| 75    | 376               | 1847137 | +      | GCTGGCCTCCAGGTGGTGACG  | -    | MXAN_1573 | AMP-binding domain protein                            |
| 77    | 227               | 1849786 | -      | CCTGGCGCGCCGGGGTGAAG   | -    | MXAN_1574 | TfoX domain-containing protein                        |
| 75    | 60                | 1854462 | -      | CACGGCGCAGCGCTTGCTAAGG | -    | MXAN_1578 | metallo-beta-lactamase family protein                 |
| 75    | 61                | 1854463 | -      | CCACGGCGCAGCGCTTGCTAAG | -    | MXAN_1578 | metallo-beta-lactamase family protein                 |
| 81    | 59                | 1854461 | -      | ACGGCGCAGCGCTTGCT      | -    | MXAN_1578 | metallo-beta-lactamase family protein                 |
| 76    | 104               | 1854518 | +      | GGGGCGCAATCCTTGCG      | -    | MXAN_1579 | hypothetical protein                                  |
| 77    | 75                | 1854547 | +      | GGGGCGCAGGTCTTGCG      | -    | MXAN_1579 | hypothetical protein                                  |
| 80    | 180               | 1860605 | -      | AAGTGGCGCGCCGCTGCTTGG  | -    | MXAN_1584 | hypothetical protein                                  |
| 80    | 180               | 1860605 | -      | AAGTGGCGCGCCGCTGCTTGG  | -    | MXAN_1584 | hypothetical protein                                  |
| 84    | 178               | 1860603 | -      | GTGGCGCGCCGCTGCT       | -    | MXAN_1584 | hypothetical protein                                  |
| 75    | 146               | 1861734 | +      | GTGGGACATCCGGTGCG      | -    | MXAN_1587 | hypothetical protein                                  |
| 76    | 130               | 1866438 | -      | GGAGGCACGCCACGCTGGAA   | -    | MXAN_1590 | putative para-aminobenzoate synthase, component I     |
| 75    | 190               | 1871142 | -      | CCTGCTCTGCAGGAGCTGAAG  | -    | MXAN_1592 | hypothetical protein                                  |

|    |     |         |   |                        |   |           |                                                                        |
|----|-----|---------|---|------------------------|---|-----------|------------------------------------------------------------------------|
| 75 | 203 | 1871155 | - | GGCTGGAAGTGGACCTGCTCTG | - | MXAN_1592 | hypothetical protein                                                   |
| 77 | 203 | 1871155 | - | GGCTGGAAGTGGACCTGCTCT  | - | MXAN_1592 | hypothetical protein                                                   |
| 78 | 130 | 1875006 | - | CATGGCACGGGGGACGAAGAGG | - | MXAN_1595 | hypothetical protein                                                   |
| 75 | 428 | 1875304 | - | GGAGGATGACCGGCTGCTGATG | - | MXAN_1595 | hypothetical protein                                                   |
| 76 | 277 | 1877522 | + | GGTGGCCAGCCGGGCGGACG   | - | MXAN_1599 | putative methyltransferase                                             |
| 75 | 44  | 1877755 | + | GTGGTGCCGCTGCTGCT      | - | MXAN_1599 | putative methyltransferase                                             |
| 75 | 398 | 1878919 | + | GGAGGCCCGCTCCGAGCTGTGG | - | MXAN_1600 | class I aminotransferase                                               |
| 79 | 267 | 1879050 | + | GGCTGGCTCGGGCGTTGCGTCC | - | MXAN_1600 | class I aminotransferase                                               |
| 85 | 270 | 1879047 | + | CTGGCTCGGGCGTTGCG      | - | MXAN_1600 | class I aminotransferase                                               |
| 80 | 268 | 1879049 | + | GGCTGGCTCGGGCGTTGCGTC  | - | MXAN_1600 | class I aminotransferase                                               |
| 79 | 398 | 1881868 | - | GTGGCCCGGGCACTGCG      | - | MXAN_1601 | fatty acid desaturase family protein<br>putative non-ribosomal peptide |
| 76 | 297 | 1883277 | + | GTGGCCTGGGTGGTGCC      | - | MXAN_1603 | synthetase                                                             |
| 78 | 262 | 1889174 | + | TGCTGGAAGGGTGCCTGCTGGG | - | MXAN_1605 | putative permease                                                      |
| 79 | 263 | 1889173 | + | TGCTGGAAGGGTGCCTGCTGG  | - | MXAN_1605 | putative permease                                                      |
| 78 | 265 | 1889171 | + | CTGGAAGGGTGCCTGCTGCT   | - | MXAN_1605 | putative permease                                                      |
| 75 | 256 | 1890469 | + | GGTGGCCCGCTTCATGCTGGAG | - | MXAN_1606 | hypothetical protein                                                   |
| 75 | 260 | 1890465 | + | GTGGCCCGCTTCATGCT      | - | MXAN_1606 | hypothetical protein                                                   |
| 75 | 294 | 1910612 | - | GTAGGAACGCACGACCTCAAG  | - | MXAN_1608 | hypothetical protein                                                   |

**3 NRPS/PKS 3251570-3266656**

**4 PKS 4029025-4040172**

| Score | Distance From ORF | N       | Strand | Sequence               | Gene | Synonym   | Protein Name                          |
|-------|-------------------|---------|--------|------------------------|------|-----------|---------------------------------------|
| 76    | 178               | 4029404 | +      | GCTGGTCCACATCATGCTCGAG | -    | MXAN_3460 | Gfo/Idh/MocA family<br>oxidoreductase |
| 76    | 182               | 4029400 | +      | CTGGTCCACATCATGCT      | -    | MXAN_3460 | Gfo/Idh/MocA family<br>oxidoreductase |

**5 NRPS/PKS 4220394-4350875**

| Score | Distance From ORF | N       | Strand | Sequence               | Gene | Synonym   | Protein Name                                          |
|-------|-------------------|---------|--------|------------------------|------|-----------|-------------------------------------------------------|
| 75    | 319               | 4254532 | -      | ATGGCGGAAGAGCTGCT      | -    | MXAN_3627 | hypothetical protein                                  |
| 75    | 398               | 4255390 | -      | ACTGCCACGCCAGCAGCTCGGG | -    | MXAN_3628 | thioesterase<br>non-ribosomal peptide biosynthesis    |
| 75    | 399               | 4255391 | -      | AACTGCCACGCCAGCAGCTCG  | -    | MXAN_3628 | thioesterase                                          |
| 75    | 308               | 4259689 | -      | CTGGCGGACATCTGGCA      | -    | MXAN_3630 | polyketide synthase type I                            |
| 75    | 287               | 4264309 | -      | GAAGGAACAGCTGTTGCGCATG | -    | MXAN_3631 | polyketide synthase type I                            |
| 78    | 286               | 4264308 | -      | AAGGAACAGCTGTTGCG      | -    | MXAN_3631 | polyketide synthase type I                            |
| 76    | 211               | 4284118 | +      | AAGGCGTGCGCATTGCT      | -    | MXAN_3635 | non-ribosomal peptide<br>synthase/polyketide synthase |
| 77    | 32                | 4334952 | +      | CTGGTACTTCGAGTGCA      | -    | MXAN_3638 | M19 family peptidase                                  |
| 76    | 311               | 4347401 | -      | GTGGAAAACCATCTGCT      | -    | MXAN_3644 | isochorismatase                                       |
| 75    | 268               | 4351143 | -      | GTGGCACGCGAAATCCC      | -    | MXAN_3647 | 2,3-dihydroxybenzoate-2,3-<br>dehydrogenase           |

**6 PKS 4498820-4544105**

| Score | Distance From ORF | N       | Strand | Sequence          | Gene | Synonym   | Protein Name        |
|-------|-------------------|---------|--------|-------------------|------|-----------|---------------------|
| 76    | 284               | 4498536 | +      | TTGAGACGGAGATTGCG | -    | MXAN_3778 | DnaK family protein |

**7 PKS 4729983-4809194**

| Score | Distance From ORF | N       | Strand | Sequence              | Gene | Synonym   | Protein Name                                             |
|-------|-------------------|---------|--------|-----------------------|------|-----------|----------------------------------------------------------|
| 75    | 337               | 4731192 | -      | CGTGGGCCGGTCCGGCTCAAG | -    | MXAN_3931 | hypothetical protein                                     |
| 76    | 73                | 4740097 | -      | TCAGACACGCCATCGCTGATC | -    | MXAN_3932 | polyketide synthase                                      |
| 75    | 90                | 4740114 | -      | CTTGAAAACCGGTTGCTCAGA | -    | MXAN_3932 | polyketide synthase                                      |
| 75    | 103               | 4755572 | -      | AGGTGGTACTTCGCTTACTCG | -    | MXAN_3933 | mixed type I polyketide synthase -<br>peptide synthetase |

|           |          |          |                 |                        |                        |           |                                                        |                                                    |
|-----------|----------|----------|-----------------|------------------------|------------------------|-----------|--------------------------------------------------------|----------------------------------------------------|
| 76        | 101      | 4755570  | -               | GTGGTACTTCGCTTACT      | -                      | MXAN_3933 | mixed type I polyketide synthase - peptide synthetase  |                                                    |
| 75        | 428      | 4784222  | -               | ATTGGCTCGCGTCTGGCTGCGC | -                      | MXAN_3935 | non-ribosomal peptide synthase/polyketide synthase Ta1 |                                                    |
| 77        | 221      | 4784015  | -               | TGCTGGCACGAACCCTGGGCG  | -                      | MXAN_3935 | non-ribosomal peptide synthase/polyketide synthase Ta1 |                                                    |
| 82        | 427      | 4784221  | -               | TTGGCTCGCGTCTGGCT      | -                      | MXAN_3935 | non-ribosomal peptide synthase/polyketide synthase Ta1 |                                                    |
| 78        | 219      | 4784013  | -               | CTGGCACGAACCCTGGG      | -                      | MXAN_3935 | non-ribosomal peptide synthase/polyketide synthase Ta1 |                                                    |
| 75        | 315      | 4784109  | -               | TTGGCGCTGAGCGTGCC      | -                      | MXAN_3935 | non-ribosomal peptide synthase/polyketide synthase Ta1 |                                                    |
| 78        | 333      | 4790662  | -               | GTTGGTCCGCCGGCGGTGGAG  | -                      | MXAN_3936 | polyketide synthase                                    |                                                    |
| 75        | 155      | 4797857  | -               | GCTGTCGCTCGTGACGCTCAAG | -                      | MXAN_3938 | polyketide synthase                                    |                                                    |
| 76        | 245      | 4800766  | -               | GGCTGGCTCTGCAACTGCGCAG | -                      | MXAN_3941 | polyketide beta-ketoacyl:acyl carrier protein synthase |                                                    |
| 76        | 245      | 4800766  | -               | GGCTGGCTCTGCAACTGCGCA  | -                      | MXAN_3941 | polyketide beta-ketoacyl:acyl carrier protein synthase |                                                    |
| 75        | 243      | 4800764  | -               | CTGGCTCTGCAACTGCG      | -                      | MXAN_3941 | polyketide beta-ketoacyl:acyl carrier protein synthase |                                                    |
| 77        | 318      | 4804366  | -               | GTGGCGCATGCCTTTCT      | -                      | MXAN_3943 | cytochrome P450 family protein                         |                                                    |
| 77        | 97       | 4805951  | -               | CCTGGACAGCCTGCGGCTGCAG | taF                    | MXAN_3945 | polyketide TA biosynthesis protein TaF                 |                                                    |
| 76        | 464      | 4806318  | -               | CCTGTCGCGCGTGGTGTGGAC  | taF                    | MXAN_3945 | polyketide TA biosynthesis protein TaF                 |                                                    |
| 76        | 220      | 4806318  | -               | CCTGTCGCGCGTGGTGTGGAC  | -                      | MXAN_3946 | putative acyl carrier protein                          |                                                    |
| <b>8</b>  | NRPS/PKS |          | 4875470-4906976 |                        |                        |           |                                                        |                                                    |
|           |          | Distance |                 |                        |                        |           |                                                        |                                                    |
|           | Score    | From ORF | N               | Strand                 | Sequence               | Gene      | Synonym                                                | Protein Name                                       |
|           | 79       | 135      | 4900530         | -                      | CTGCCCGCAGGTTGCA       | -         | MXAN_4001                                              | non-ribosomal peptide synthase/polyketide synthase |
|           | 75       | 470      | 4906209         | -                      | AGGGCACGGCCCGTGAT      | -         | MXAN_4002                                              | nonribosomal peptide synthetase                    |
| <b>9</b>  | NRPS/PKS |          | 4996865-5026357 |                        |                        |           |                                                        |                                                    |
| <b>10</b> | NRPS/PKS |          | 5252320-5298262 |                        |                        |           |                                                        |                                                    |
|           |          | Distance |                 |                        |                        |           |                                                        |                                                    |
|           | Score    | From ORF | N               | Strand                 | Sequence               | Gene      | Synonym                                                | Protein Name                                       |
|           | 76       | 350      | 5253698         | +                      | GCTGGAGCGCGTGTCTGGCC   | -         | MXAN_4290                                              | putative thioesterase                              |
|           | 77       | 352      | 5253696         | +                      | TGCTGGAGCGCGTGTCTGG    | -         | MXAN_4290                                              | putative thioesterase                              |
|           | 76       | 354      | 5253694         | +                      | CTGGAGCGCGTGTCTGCT     | -         | MXAN_4290                                              | putative thioesterase                              |
|           | 76       | 132      | 5263568         | -                      | ATGTCGCCGTGCTTGCA      | -         | MXAN_4295                                              | patatin-like phospholipase family protein          |
|           | 77       | 150      | 5267893         | -                      | AGCTGGGAGTGGACCTGCTCA  | -         | MXAN_4296                                              | non-ribosomal peptide synthetase                   |
|           | 77       | 379      | 5279177         | -                      | GATGCGTCGGCAGTTGCTGATG | -         | MXAN_4298                                              | polyketide synthase type I                         |
|           | 80       | 178      | 5287908         | -                      | ATGGCGCTCGAGTTGCG      | -         | MXAN_4299                                              | non-ribosomal peptide synthase/polyketide synthase |
|           | 77       | 183      | 5292178         | -                      | CGCTGGCGAAGCGGCTGTGT   | -         | MXAN_4300                                              | polyketide synthase type I                         |
|           | 76       | 181      | 5292176         | -                      | CTGGCGAAGCGGCTGTCT     | -         | MXAN_4300                                              | polyketide synthase type I                         |
| <b>11</b> | PKS      |          | 5407416-5440677 |                        |                        |           |                                                        |                                                    |
| <b>12</b> | NRPS/PKS |          | 5444807-5471033 |                        |                        |           |                                                        |                                                    |

| Score | Distance From ORF | N       | Strand | Sequence               | Gene | Synonym   | Protein Name                             |
|-------|-------------------|---------|--------|------------------------|------|-----------|------------------------------------------|
| 75    | 182               | 5448069 | +      | CCTGGACGACCGGTTGGTGCTG | -    | MXAN_4413 | hypothetical protein                     |
| 78    | 328               | 5468596 | +      | CCTGGGCCACGGATTGCTGCGC | -    | MXAN_4416 | cephalosporin hydroxylase family protein |
| 79    | 332               | 5468592 | +      | CTGGGCCACGGATTGCT      | -    | MXAN_4416 | cephalosporin hydroxylase family protein |

**13 NRPS/PKS 5600883-5653548**

| Score | Distance From ORF | N       | Strand | Sequence           | Gene | Synonym   | Protein Name                   |
|-------|-------------------|---------|--------|--------------------|------|-----------|--------------------------------|
| 75    | 259               | 5612126 | -      | ATGGCGCTGGAGCTGCG  | -    | MXAN_4526 | polyketide synthase type I     |
| 78    | 373               | 5612240 | -      | ATGGCGCTGCTGTTGGA  | -    | MXAN_4526 | polyketide synthase type I     |
| 81    | 466               | 5612333 | -      | GTGGCAGGGCAGGTGCG  | -    | MXAN_4526 | polyketide synthase type I     |
| 75    | 170               | 5627582 | -      | CTGGCTGAACAACCTGCA | -    | MXAN_4527 | polyketide synthase            |
| 79    | 187               | 5653735 | -      | GTGGCACAAGCTGCGCT  | -    | MXAN_4532 | non-ribosomal peptide synthase |

**14 NRPS 5735538-5780049**

| Score | Distance From ORF | N       | Strand | Sequence               | Gene | Synonym   | Protein Name                                               |
|-------|-------------------|---------|--------|------------------------|------|-----------|------------------------------------------------------------|
| 75    | 39                | 5755794 | +      | CAATGGAACGGCGCATCCTCC  | -    | MXAN_4598 | non-ribosomal peptide synthase                             |
| 75    | 41                | 5755792 | +      | ATGGAACGGCGCATCCT      | -    | MXAN_4598 | non-ribosomal peptide synthase                             |
| 75    | 485               | 5759989 | +      | CCTGGGCTACGGGGTGTGCGC  | -    | MXAN_4599 | M28 family peptidase radical SAM domain-containing protein |
| 75    | 493               | 5765386 | -      | GGTGGCCTGGGCGTCGGTGGCG | -    | MXAN_4600 | radical SAM domain-containing protein                      |
| 75    | 40                | 5764933 | -      | GCGGTAAAGTCTTTGCT      | -    | MXAN_4600 | protein                                                    |
| 78    | 237               | 5774788 | +      | CCTGGCCCGTCTGGAGCTCCAG | -    | MXAN_4602 | hypothetical protein                                       |
| 75    | 241               | 5774784 | +      | CTGGCCCGTCTGGAGCT      | -    | MXAN_4602 | hypothetical protein                                       |
| 76    | 62                | 5777754 | +      | ATGTCGCTCGACTTGCT      | -    | MXAN_4604 | hypothetical protein                                       |

**NC\_010162.1 Sorangium cellulosum 'So ce 56', complete genome**

|          |       |                 |         |        |                   |      |                           |
|----------|-------|-----------------|---------|--------|-------------------|------|---------------------------|
| <b>1</b> | PKS   | 488146-499710   |         |        |                   |      |                           |
| <b>2</b> | PKS   | 1150403-1167578 |         |        |                   |      |                           |
|          |       | Distance        |         |        |                   |      |                           |
|          | Score | From ORF        | N       | Strand | Sequence          | Gene | Synonym                   |
|          | 76    | 300             | 1150103 | +      | CTGGCCTGCGCGTCGCT | -    | sce0818                   |
|          | 75    | 299             | 1151780 | +      | ATGGCGCTGATCTCCG  | -    | sce0819                   |
|          |       |                 |         |        |                   |      | Protein Name              |
|          |       |                 |         |        |                   |      | putative dioxygenase      |
|          |       |                 |         |        |                   |      | polyketide synthase       |
| <b>3</b> | NRPS  | 3204860-3216562 |         |        |                   |      |                           |
| <b>4</b> | PKS   | 4376667-4461851 |         |        |                   |      |                           |
|          |       | Distance        |         |        |                   |      |                           |
|          | Score | From ORF        | N       | Strand | Sequence          | Gene | Synonym                   |
|          | 84    | 488             | 4376179 | +      | CTGGCAGGATATCTGCT | -    | sce3188                   |
|          | 77    | 52              | 4440389 | +      | CTGGGGCGGATCTCGCT | -    | sce3193                   |
|          |       |                 |         |        |                   |      | Protein Name              |
|          |       |                 |         |        |                   |      | polyketide synthase       |
|          |       |                 |         |        |                   |      | polyketide synthase       |
| <b>5</b> | PKS   | 5761328-5853706 |         |        |                   |      |                           |
| <b>6</b> | PKS   | 6867494-6856887 |         |        |                   |      |                           |
| <b>7</b> | PKS   | 9402480-9513516 |         |        |                   |      |                           |
|          |       | Distance        |         |        |                   |      |                           |
|          | Score | From ORF        | N       | Strand | Sequence          | Gene | Synonym                   |
|          | 81    | 172             | 9407529 | -      | TCGGCAGGCTGCCTGCA | -    | sce6747                   |
|          | 90    | 68              | 9411437 | -      | GTGGCGCGCCGCTTGCT | -    | sce6751                   |
|          | 75    | 485             | 9425010 | -      | GTGGCGCGCGGCTGCC  | -    | sce6759                   |
|          | 75    | 4               | 9436354 | +      | ATGGCAGGAGGGGTGAT | -    | sce6766                   |
|          |       |                 |         |        |                   |      | Protein Name              |
|          |       |                 |         |        |                   |      | hypothetical protein      |
|          |       |                 |         |        |                   |      | hypothetical protein      |
|          |       |                 |         |        |                   |      | hypothetical protein      |
|          |       |                 |         |        |                   |      | putative secreted protein |

|    |     |         |   |                   |   |         |                                       |
|----|-----|---------|---|-------------------|---|---------|---------------------------------------|
| 81 | 80  | 9440680 | - | CGGGCACGGGCGCTGCT | - | sce6770 | hypothetical protein                  |
| 80 | 438 | 9441038 | - | AGGGCATGATCGTTGCC | - | sce6770 | hypothetical protein                  |
| 77 | 38  | 9452036 | - | GCGGTACACCCCTTGCG | - | sce6780 | hypothetical protein                  |
| 75 | 93  | 9452091 | - | GAGGCGCGGGGATGCT  | - | sce6780 | hypothetical protein                  |
| 81 | 344 | 9452342 | - | CTGGCTCGAGGCTGCA  | - | sce6780 | hypothetical protein                  |
| 75 | 212 | 9452057 | + | GCGGCCGCCGCTGCT   | - | sce6781 | TetR family transcriptional regulator |
| 77 | 479 | 9456589 | + | ACGGCACGCGACGTGCG | - | sce6785 | hypothetical protein                  |
| 77 | 260 | 9460836 | + | CTGGCACGGGCGAGCT  | - | sce6787 | hypothetical protein                  |
| 78 | 361 | 9466227 | - | CTGGCGCTCGATCTGCT | - | sce6792 | hypothetical protein                  |
| 77 | 107 | 9470202 | - | TTCGCATGGCTGTTGGA | - | sce6797 | hypothetical protein                  |
| 75 | 293 | 9479287 | - | ATGGTTCTTCTCGCT   | - | sce6805 | hypothetical protein                  |
| 77 | 345 | 9497084 | - | GTGGATCGAGTCATGCT | - | sce6819 | hypothetical protein                  |

**8 NRPS/PKS 11424644-11529102**

| Score | Distance |          | Strand | Sequence            | Gene  | Synonym | Protein Name                                 |
|-------|----------|----------|--------|---------------------|-------|---------|----------------------------------------------|
|       | From ORF | N        |        |                     |       |         |                                              |
| 81    | 427      | 11427264 | -      | GGGGCACGATCGCTGCT   | -     | sce8207 | sigma-54 dependent transcriptional regulator |
| 84    | 42       | 11432421 | -      | CTGGCATCCCTCGTCTGCT | -     | sce8210 | putative DNA helicase                        |
| 75    | 419      | 11456144 | +      | AGGGCGCGGGCTGCTGCA  | -     | sce8233 | hypothetical protein                         |
| 82    | 43       | 11458261 | +      | AGGGCACGGCTCTTGGGA  | -     | sce8234 | hypothetical protein                         |
| 76    | 173      | 11460728 | +      | GTGGCCGACGTCTGCT    | yfbL2 | sce8235 | putative aminopeptidases                     |
| 75    | 388      | 11472575 | +      | GTGGCGGCTCCCCGCT    | -     | sce8244 | putative protein phosphatase                 |
| 75    | 371      | 11475747 | -      | GAGGCCAGCTCGTGCA    | -     | sce8246 | CobW/P47K family protein                     |

**NC\_002163.1 Campylobacter jejuni subsp. jejuni NCTC 11168, complete genome**

**1 NRPS 1236809-1238584**

**NC\_000913.2 Escherichia coli str. K-12 substr. MG1655, complete genome**

**1 NRPS 608682-631222**

| Score | Distance |        | Strand | Sequence           | Gene | Synonym | Protein Name                                                                            |
|-------|----------|--------|--------|--------------------|------|---------|-----------------------------------------------------------------------------------------|
|       | From ORF | N      |        |                    |      |         |                                                                                         |
| 78    | 373      | 612792 | +      | ATCGCACCGTGGTTGCC  | ybdZ | b4511   | conserved protein                                                                       |
| 80    | 361      | 619783 | -      | CTGGTACGCCGATGCG   | fepC | b0588   | iron-enterobactin transporter subunit                                                   |
| 79    | 153      | 620564 | -      | CCGTCAGCTACTTCTGCT | fepG | b0589   | iron-enterobactin transporter subunit                                                   |
| 79    | 138      | 621385 | +      | CGGGCACGGCAATGGCG  | entS | b0591   | enterobactin exporter, iron-regulated                                                   |
| 76    | 428      | 624161 | -      | TGGGCGCAAGTGTGCC   | fepB | b0592   | iron-enterobactin transporter subunit                                                   |
| 79    | 291      | 625002 | +      | CTGGCCTGTCTGCTGCA  | entE | b0594   | 2,3-dihydroxybenzoate-AMP ligase component of enterobactin synthase multienzyme complex |

**NC\_002942.5 Legionella pneumophila subsp. pneumophila str. Philadelphia 1, complete genome**

**1 NRPS/PKS 2166115-2171151**

**2 NRPS/PKS 2442757-2470485**

**NC\_002516.2 Pseudomonas aeruginosa PAO1, complete genome**

**1 NRPS 2532669-2549458**

| Score | Distance |         | Strand | Sequence        | Gene | Synonym | Protein Name                     |
|-------|----------|---------|--------|-----------------|------|---------|----------------------------------|
|       | From ORF | N       |        |                 |      |         |                                  |
| 90    | 276      | 2539319 | -      | CTGGCCGGGCTTGCT | -    | PA2302  | non-ribosomal peptide synthetase |

|    |     |         |   |                   |   |        |                                     |
|----|-----|---------|---|-------------------|---|--------|-------------------------------------|
| 79 | 154 | 2545100 | - | ATGGCGCTGCTGTTGGT | - | PA2305 | non-ribosomal peptide synthetase    |
| 83 | 8   | 2545667 | - | ATGGAACGAATGTCGCT | - | PA2306 | hypothetical protein                |
| 84 | 55  | 2547555 | - | CTGGCAGGACTATTCT  | - | PA2308 | ABC transporter ATP-binding protein |

|          |       |                   |         |        |                   |      |         |                         |
|----------|-------|-------------------|---------|--------|-------------------|------|---------|-------------------------|
| <b>2</b> | NRPS  | 2636517-2687178   |         |        |                   |      |         |                         |
|          | Score | Distance From ORF | N       | Strand | Sequence          | Gene | Synonym | Protein Name            |
|          | 75    | 125               | 2640910 | +      | ACGGCACTGTCCTCCA  | fpvR | PA2388  | FpvR                    |
|          | 80    | 88                | 2651219 | +      | CTGGCGCCGAGCCTGCT | pvdO | PA2395  | PvdO                    |
|          | 75    | 140               | 2653197 | -      | CTTCCACGTAATGCA   | pvdF | PA2396  | pyoverdine synthetase F |
|          | 77    | 421               | 2665565 | -      | CTGGCGCGGATGCCGCT | pvdD | PA2399  | pyoverdine synthetase D |
|          | 77    | 479               | 2672108 | -      | CTGGCGCGGATGCCGCT | pvdJ | PA2400  | PvdJ                    |

|          |       |                   |         |        |                   |      |         |                                                     |
|----------|-------|-------------------|---------|--------|-------------------|------|---------|-----------------------------------------------------|
| <b>3</b> | NRPS  | 4724639-4746551   |         |        |                   |      |         |                                                     |
|          | Score | Distance From ORF | N       | Strand | Sequence          | Gene | Synonym | Protein Name                                        |
|          | 81    | 393               | 4727194 | -      | CTGGCTCGCGGGCTGCT | fptA | PA4221  | Fe(III)-pyochelin outer membrane receptor precursor |
|          | 78    | 265               | 4728882 | -      | CCGGCGAGCCTGTTGCT | -    | PA4222  | ABC transporter ATP-binding protein                 |
|          | 80    | 286               | 4728903 | -      | CTGGCCGTGCGCTGCT  | -    | PA4222  | ABC transporter ATP-binding protein                 |
|          | 75    | 43                | 4731415 | -      | CTGGCGCAATCCTTGTC | pchG | PA4224  | pyochelin biosynthetic protein PchG                 |
|          | 75    | 16                | 4736814 | -      | CTGGAAGAGGGCGTGCT | pchF | PA4225  | pyochelin synthetase                                |
|          | 81    | 64                | 4736862 | -      | CTTGCCCGCACTTGCA  | pchF | PA4225  | pyochelin synthetase                                |
|          | 77    | 465               | 4741576 | -      | CTGGTCGGCGCCTTGCA | pchE | PA4226  | dihydroaeruginic acid synthetase                    |

**NC\_002947.3 Pseudomonas putida KT2440, complete genome**

|          |       |                   |         |        |                   |      |         |                                                  |
|----------|-------|-------------------|---------|--------|-------------------|------|---------|--------------------------------------------------|
| <b>1</b> | NRPS  | 4767855-4798662   |         |        |                   |      |         |                                                  |
|          | Score | Distance From ORF | N       | Strand | Sequence          | Gene | Synonym | Protein Name                                     |
|          | 79    | 278               | 4795256 | -      | TTGGCGCCGAAGGTGCA | -    | PP_4222 | syrP protein, putative                           |
|          | 77    | 431               | 4795409 | -      | ATGGGGCAGCGGTTGCG | -    | PP_4222 | syrP protein, putative                           |
|          | 80    | 413               | 4796855 | -      | ATGGGCCAGGCATTGCT | -    | PP_4223 | diaminobutyrate--2-oxoglutarate aminotransferase |
| <b>2</b> | NRPS  | 4818235-4832793   |         |        |                   |      |         |                                                  |
|          | Score | Distance From ORF | N       | Strand | Sequence          | Gene | Synonym | Protein Name                                     |
|          | 76    | 122               | 4832915 | -      | TTGGCCAGTGGCCTGCT | -    | PP_4245 | siderophore biosynthesis protein, putative       |

**NC\_004578.1 Pseudomonas syringae pv. tomato str. DC3000, complete genome**

|          |       |                   |         |        |                    |      |            |                                               |
|----------|-------|-------------------|---------|--------|--------------------|------|------------|-----------------------------------------------|
| <b>1</b> | NRPS  | 2307009-2356936   |         |        |                    |      |            |                                               |
|          | Score | Distance From ORF | N       | Strand | Sequence           | Gene | Synonym    | Protein Name                                  |
|          | 81    | 315               | 2306694 | +      | ATGGAATTCACCTTGCT  | -    | PSPTO_2134 | pyoverdine synthetase, thioesterase component |
|          | 76    | 381               | 2322147 | +      | CTGGTCGGTCATTGCA   | -    | PSPTO_2137 | MbtH-like protein                             |
|          | 78    | 274               | 2324978 | -      | CCGGCGCCGAAATTGCT  | -    | PSPTO_2139 | cation ABC transporter, permease protein      |
|          | 80    | 491               | 2327813 | -      | CTGGCACAAAGTGGCGCT | -    | PSPTO_2143 | hypothetical protein                          |

|          |          |                   |                 |        |                    |      |            |                                                                   |
|----------|----------|-------------------|-----------------|--------|--------------------|------|------------|-------------------------------------------------------------------|
|          | 75       | 384               | 2330265         | +      | CTGGA AACGACGTGCT  | -    | PSPTO_2147 | pyoverdine sidechain peptide synthetase I, epsilon-Lys module     |
|          | 77       | 389               | 2333571         | +      | CCGACACACTGTTGCT   | -    | PSPTO_2148 | pyoverdine sidechain peptide synthetase II, D-Asp-L-Thr component |
| <b>2</b> | NRPS/PKS |                   | 2863432-2890634 |        |                    |      |            |                                                                   |
|          | Score    | Distance From ORF | N               | Strand | Sequence           | Gene | Synonym    | Protein Name                                                      |
|          | 76       | 322               | 2868091         | -      | TTGGCGCGGGTGCCGCA  | -    | PSPTO_2593 | multidrug resistance protein, AcrA/AcrE family                    |
|          | 79       | 78                | 2872757         | -      | GTGGCCAGGCTCTGGCA  | irp4 | PSPTO_2598 | yersiniabactin synthetase, thioesterase component                 |
|          | 81       | 235               | 2873968         | -      | CTGGCGCAACTCGCA    | irp3 | PSPTO_2599 | yersiniabactin synthetase, thiazolanyl reductase component        |
|          | 80       | 112               | 2884576         | -      | CTGGCGCGGCACTTGAG  | -    | PSPTO_2601 | hypothetical protein                                              |
|          | 78       | 384               | 2884848         | -      | CTGGCGCTGACGTGGCT  | -    | PSPTO_2601 | hypothetical protein                                              |
|          | 75       | 89                | 2890723         | -      | CAGGCTCGGA ACTGGCA | -    | PSPTO_2602 | yersiniabactin non-ribosomal peptide synthetase                   |
| <b>3</b> | NRPS     |                   | 3151815-3185293 |        |                    |      |            |                                                                   |
|          | Score    | Distance From ORF | N               | Strand | Sequence           | Gene | Synonym    | Protein Name                                                      |
|          | 76       | 472               | 3152407         | +      | TTGATACGGCTGATGCT  | syfA | PSPTO_2829 | non-ribosomal peptide synthetase SyfA                             |
| <b>4</b> | NRPS     |                   | 5087432-5106501 |        |                    |      |            |                                                                   |
|          | Score    | Distance From ORF | N               | Strand | Sequence           | Gene | Synonym    | Protein Name                                                      |
|          | 76       | 440               | 5088005         | +      | CTGGCAGCCTGGTTCT   | -    | PSPTO_4518 | non-ribosomal peptide synthetase, initiating component            |
| <b>5</b> | PKS      |                   | 5282597-5304804 |        |                    |      |            |                                                                   |
|          | Score    | Distance From ORF | N               | Strand | Sequence           | Gene | Synonym    | Protein Name                                                      |
|          | 75       | 23                | 5284944         | +      | CTGGTCCGCAAGTCGCT  | cfa3 | PSPTO_4683 | coronafacic acid beta-ketoacyl synthetase component               |
|          | 75       | 194               | 5286445         | +      | CTGCCAGGCCA ACTGCT | cfa5 | PSPTO_4685 | coronafacic acid synthetase, ligase component                     |
| <b>6</b> | NRPS     |                   | 5313602-5327197 |        |                    |      |            |                                                                   |

**NC\_003198.1 Salmonella enterica subsp. enterica serovar Typhi str. CT18, complete genome**

|          |       |                   |               |        |                   |      |         |                                                           |
|----------|-------|-------------------|---------------|--------|-------------------|------|---------|-----------------------------------------------------------|
| <b>1</b> | NRPS  |                   | 624926-644794 |        |                   |      |         |                                                           |
|          | Score | Distance From ORF | N             | Strand | Sequence          | Gene | Synonym | Protein Name                                              |
|          | 82    | 483               | 640548        | -      | CTGGCGCAATTTCTGCT | fepB | STY0638 | iron-enterobactin transporter periplasmic binding protein |
|          | 79    | 288               | 641267        | +      | CTGGCCTGTCTGCTGCA | entE | STY0640 | enterobactin synthase subunit E                           |

**NC\_004347.1 Shewanella oneidensis MR-1, complete genome**

|          |       |                   |                 |        |                   |      |         |                         |
|----------|-------|-------------------|-----------------|--------|-------------------|------|---------|-------------------------|
| <b>1</b> | PKS   |                   | 1670313-1686159 |        |                   |      |         |                         |
|          | Score | Distance From ORF | N               | Strand | Sequence          | Gene | Synonym | Protein Name            |
|          | 78    | 441               | 1676645         | -      | ATAGCATGAGTATTGCC | -    | SO_1599 | beta keto-acyl synthase |



NC\_003143.1 *Yersinia pestis* CO92, complete genome

| 1     |          | NRPS     |         | 839849-856936   |                   |      |         |                                           |
|-------|----------|----------|---------|-----------------|-------------------|------|---------|-------------------------------------------|
| Score | Distance | From ORF | N       | Strand          | Sequence          | Gene | Synonym | Protein Name                              |
| 79    |          | 186      | 841919  | -               | CGGGCACTATTGCTGCT | -    | YPO0774 | hypothetical protein                      |
| 81    |          | 353      | 857289  | -               | ATGGCCCCCGCCTGCT  | -    | YPO0778 | putative siderophore biosynthesis protein |
| 2     |          | NRPS/PKS |         | 2140840-2169669 |                   |      |         |                                           |
| Score | Distance | From ORF | N       | Strand          | Sequence          | Gene | Synonym | Protein Name                              |
| 82    |          | 239      | 2145615 | -               | CTGGCGCGACTGCTGCG | irp4 | YPO1908 | yersiniabactin biosynthetic protein YbtT  |
| 75    |          | 486      | 2166571 | +               | ATGACACGCTGCTGGCG | irp8 | YPO1915 | putative signal transducer                |
| 83    |          | 441      | 2167924 | +               | CTGGCCGGCGGATTGCT | ybtS | YPO1916 | salicylate synthase Irp9                  |
| 79    |          | 96       | 2168269 | +               | GGGGCATTACGTTGCT  | ybtS | YPO1916 | salicylate synthase Irp9                  |
